1 **Genome-wide analysis of the polyamine oxidase gene family in**  
2 **wheat (*Triticum aestivum* L.) reveals involvement in temperature**  
3 **stress response**

4 Authors:

5 Fatemeh Gholizadeh, Ghader Mirzaghaderi\*

6 Address:

7 Department of Agronomy and Plant Breeding, Faculty of Agriculture, University of Kurdistan,

8 P. O. Box 416, Sanandaj, Iran

9

10 \*Corresponding author, E-mail: [gh.mirzaghaderi@uok.ac.ir](mailto:gh.mirzaghaderi@uok.ac.ir), ORCID: 0000-0002-4578-3374

11

12 Phone: +98-8733620552

13 Fax: +98-8733620553

14

15 **Short title:**

16 *PAO* gene family in common wheat

17

18

19

20

21

22

23

1 **Abstract** Amine oxidases (AOs) including copper containing amine oxidases (CuAOs) and  
2 FAD-dependent polyamine oxidases (PAOs) are associated with polyamine catabolism in the  
3 peroxisome, apoplast and cytoplasm and play an essential role in growth and developmental  
4 processes and response to biotic and abiotic stresses. Here, we identified *PAO* genes in  
5 common wheat (*Triticum aestivum*), *T. urartu* and *Aegilops tauschii* and reported the genome  
6 organization, evolutionary features and expression profiles of the wheat PAO genes  
7 (*TaPAO*). Expression analysis using publicly available RNASeq data showed that *TaPAO*  
8 genes are expressed redundantly in various tissues and developmental stages. A large  
9 percentage of *TaPAOs* respond significantly to abiotic stresses, especially temperature (i.e.  
10 heat and cold stress). Some *TaPAOs* were also involved in response to other stresses such as  
11 powdery mildew, stripe rust and *Fusarium* infection. Overall, *TaPAOs* may have various  
12 functions in stress tolerances responses, and play vital roles in different tissues and  
13 developmental stages. Our results provided a reference for further functional investigation of  
14 TaPAO proteins.

15  
16 **Keywords:** polyamine oxidase (PAO), polyamine, biotic and abiotic stress, wheat

17  
18  
19 **Introduction**

20 Common wheat (*Triticum aestivum* L.,  $2n = 6x = 42$ ; AABBDD genome), is one of the  
21 most important cereal crops. It is constantly exposed to abiotic and biotic stresses such as heat,  
22 cold, salinity, drought and various fungal diseases. These stresses reduce growth and yield and  
23 may cause plant death. Therefore it is essential to understand how wheat adapts and survives  
24 in stressful environments, and to develop methods to increase its tolerance under environmental  
25 stresses [1].

1 Polyamines (PAs), are small aliphatic amines of low molecular weight that are involved in  
2 various developmental processes in living organisms. Main PAs in cells include diamine  
3 putrescine (Put), triamine spermidine (Spd), tetramines spermine (Spm), cadaverine (Cad) and  
4 thermospermine (T-Spm). Due to their cationic nature, polyamines are capable of binding to  
5 negatively charged molecules such as RNA and DNA and affect gene expression, protein  
6 synthesis and regulation of ion channels [2]. De novo production of PAs in plants includes Put  
7 production directly from ornithine by ornithine decarboxylase (ODC), or indirectly from  
8 arginine by arginine decarboxylase (ADC) [1]. Put is then converted into Spd by spermidine  
9 synthase with the addition of an amino propyl moiety donated by decarboxylated S-adenosyl  
10 methionine (dcSAM). Similarly, Spm (and its isomer T-Spm) is formed from Spd via Spm  
11 synthase, with the same amino propyl group rendered by dcSAM [3, 4] (Fig. 1).

12 PAs can be oxidized by copper-containing diamine oxidases (CuAOs or DAOs) and flavin-  
13 containing (FAD-containing) polyamine oxidases (PAOs) [5]. DAOs mainly catalyze the  
14 oxidation of Put and Cad producing 4-aminobutanal, ammonia (NH<sub>3</sub>) and hydrogen peroxide  
15 (H<sub>2</sub>O<sub>2</sub>) [6, 7]. POAs are divided into two major groups. The first group catalyzes Spd and Spm  
16 to produce 1,3-diaminopropane (DAP), H<sub>2</sub>O<sub>2</sub>, and N-(3-aminopropyl)-4-aminobutanal or  
17 4-aminobutanal, which is referred to as the terminal catabolism (TC) pathway [5, 7, 8]. The  
18 second group is involved in the back conversion (BC) pathway by converting Spm back to Spd  
19 and Spd to Put [7, 9].

20 Plants accumulate osmolyte compounds in response to abiotic stresses such as drought and  
21 salinity. Major cellular osmolytes including proline, glycine betaine, and PAs are found in  
22 plants, animals, and bacteria [10]. In plants, PAs are essential for development and stress  
23 response. Many plant processes such as embryogenesis, organogenesis, particularly flower  
24 initiation and development, fruit setting and ripening, as well as leaf senescence, require PAs

1 [3, 11]. Cells need to maintain the homeostasis of PAs through their modulation, biosynthesis,  
2 conjugation, and transport, since high concentrations of polyamines are highly toxic [12].

3 Spd and Spm and Put levels are differentially regulated by environmental stresses [13],  
4 although the mechanism of PA action in response to stresses still remain unclear. Put levels are  
5 increased with low potassium ( $K^+$ ) availability in plants suggest that Put and its catabolites  
6 possess a potential in controlling cellular  $K^+$  and  $Ca^{2+}$  [14]. During drought, the PA pathway is  
7 activated which leads to a Put to Spd canalization that is ABA-dependent. Drought tolerant and  
8 sensitive cultivars seem to be different in their capacity to accumulate different PAs over a  
9 minimum threshold [15].

10  $H_2O_2$  produced through PA oxidation is involved in a hyper-sensitive (HR) reaction that  
11 can lead to bacterial pathogen tolerance [16]. Exogenous Spm results in HR-mediated  
12 resistance of *Arabidopsis* leaves to cucumber mosaic virus via the induction of the expression  
13 of some  $H_2O_2$  -dependent signaling components and transcription factors. Addition of a PAO  
14 inhibitor represses the activation of defense genes and alleviates ROS generation and HR,  
15 confirming that PAO is involved in the resistance response [17]. There is evidence that PA  
16 oxidation in the apoplast together with the generated reactive oxygen species (ROS) are  
17 involved in programmed cell death (PCD) and xylem differentiation [3]. The transcript levels  
18 of PA synthesis genes, and the activities of corresponding enzymes are responsive to stresses,  
19 providing a relationship between polyamine and stresses [1]. Plant PAOs play significant roles  
20 in metal (e.g. aluminum, copper, and cadmium) toxicity tolerance [18-22]. In wheat, the cell  
21 wall-bound PAO (CW-PAO) oxidized Spd and generated  $H_2O_2$  under aluminum toxicity but  
22 Put application resulted in plant tolerance against Aluminum-induced oxidative stress via  
23 inhibiting PAO activity and hence lowering  $H_2O_2$  production [20].

24 *PAO* genes have been isolated and characterized from several model plants. One of the  
25 first polyamine oxidases identified was a FAD-based PAO in maize apoplast, a 53-kDa

1 monomeric glycoprotein enzyme [23]. Most of the identified plant *PAO* genes such as *A.*  
2 *thaliana* *AtPAO1* to *AtPAO5* are involved in the BC pathway. *AtPAO1* and *AtPAO5* are  
3 located in the cytoplasm, while *AtPAO2*, *AtPAO3* and *AtPAO4* have a peroxisomal  
4 localization [24-26]. *AtPAO1* is involved in biotic and abiotic stress tolerance and may play  
5 roles in root development and fertility. On the other hand *AtPAO2* might be involved in root,  
6 shoot, leaf, and flower development. *AtPAO3* and *AtPAO4* are expressed in all tissues and  
7 whole growth stages and show similar expression patterns [27, 28]. Rice harbors seven *PAO*  
8 genes. *OsPAO3* and *OsPAO5* are very similar and highly expressed in both the seedling stage  
9 and in mature plants, while the other *PAO* members are only expressed at very low levels in  
10 all plant tissues. *OsPAO4* and *OsPAO5* prefer to use Spm and T-Spm as substrates, but  
11 cannot oxidize Spd to Put. Therefore, *OsPAO3* catalyzes a full BC-type pathway, while  
12 *OsPAO4* and *OsPAO5* only catalyze a partial BC-type pathway [4].

13 In the present study, polyamine oxidase genes were identified in *T. aestivum*, *T. urartu*  
14 and *Aegilops tauschii* using bioinformatic approaches and their gene structure, conserved  
15 protein motifs and domains and phylogenetic relationships were analyzed. Furthermore, we  
16 examined the expression of the wheat *PAO* genes over different tissues and developmental  
17 stages and in response to biotic and abiotic stresses.

18

## 19 **Materials and Methods**

### 20 **Identification of *PAO* genes**

21 Polyamine oxidase genes of common wheat (*T. aestivum*) and its relatives *T. urartu* and  
22 *Ae. tauschii*, were identified by BLASTP search, Hidden Markov Model (HMM) analysis and  
23 validation of conservative domains. For this, the *Arabidopsis* and rice *PAO* protein sequences  
24 (supplementary File 1) were used as queries to perform BLASTP searches against the *T.*  
25 *aestivum*, *T. urartu* and *Ae. tauschii* genome (E-value < 1e-5) in the EnsemblPlants database

1 at <https://plants.ensembl.org>. Furthermore, an HMM matrix of five AtPAO and seven OsPAO  
2 protein sequences was used to search the PAO proteins in jackhmmmer  
3 (<https://www.ebi.ac.uk/tools/hmmer/search/jackhmmmer>) [29]. We then selected the unique  
4 sequences of the above two search results and checked them for the presence of each of the  
5 amine oxidase domains (Pfam: PF01593) alone or in combination with copper amine oxidase  
6 (N2 and/or N3-terminal), using the Pfam (<https://pfam.xfam.org>) and InterPro  
7 (<http://www.ebi.ac.uk/interpro>) databases. Proteins with amine oxidase in combination with  
8 other extra domains were excluded, as such architectures are known to have functions  
9 different from PAO. For example, plant lysine histone demethylases which possess an  
10 additional SWIRM domain are involved in demethylation of mono- and di-methylated lysines  
11 of histones [30]. Other described genes such as zeta-carotene desaturase, protoporphyrinogen  
12 oxidase, prolycopene isomerase and protein FLOWERING locus D-like protein were also  
13 excluded.

#### 14 **Identification of orthologs and homoeologs**

15 *PAO* homoeologous genes and pairwise gene orthologs among *T. aestivum*, *T. urartu*, *Ae.*  
16 *tauschii*, *A. thaliana* and *Oryza sativa* were identified through the “homoeologous” and  
17 “orthologous” links in the gene-based display of the EnsemblPlants summary page for each  
18 target gene. PAO genes were mapped to their respective locus in the wheat genome in a  
19 circular diagram using shinyCircos [31] where homoeologous chromosomes were aligned  
20 close together and banded according to the general FISH patterns of p*Ta535-1* and (GAA)<sub>10</sub>  
21 probes.

#### 22 **Characterization of *TaPAO* genes**

23 Characteristics of each of the identified amino oxidase proteins such as isoelectric point  
24 (pI), amino acid sequence length (AA) and molecular weight (MW) were obtained from the  
25 ProtParam website at <https://web.expasy.org/protparam> [32]. A GFF3 annotation file

1 containing the locations of *TaPAOs* in genome and their structural information was extracted  
2 from the wheat GFF3 file and the exon-intron structures was displayed using the Gene  
3 Structure Display Server (GSDS, <http://gsds.cbi.pku.edu.cn>) [33]. The conserved domains of  
4 the *TaPAO* protein sequences were searched from Pfam [34] and MEME [35] websites and  
5 the resulting files were visualized in TBtools software [36]. Wheat and rice PAO protein  
6 sequences were also aligned in Jalview [37] and the locations of the domains identified by  
7 MEME, were determined on the alignment output file.

### 8 **Phylogenetic analysis**

9 Multiple sequence alignment of the full-length protein sequences of the identified PAO  
10 proteins was performed using the “msa” package [38] of R version 3.6.1 (The R Project for  
11 Statistical Computing, Vienna, Austria). Subsequently, a neighbor-joining tree was obtained  
12 with 100 bootstrap replicates using the “ape” package [39] and used to generate a tree in R  
13 using the “ggtree” package [40].

### 14 15 **Expression analysis of *TaPAO* genes using RNAseq**

16 RNAseq data of 30 *TaPAO* genes was retrieved from [www.wheat-expression.com](http://www.wheat-expression.com) [41] as  
17 processed expression values in transcripts per million (TPM) for all the available tissues and  
18 developmental stages [42] and for response to different stresses including *Fusarium* [43, 44],  
19 cold [45], *Zymoseptoria* [46], heat and drought [47], phosphorous starvation [48], powdery  
20 mildew [49] and PEG (<https://www.ebi.ac.uk/ena/browser/view/PRJNA306536>). *TaPAO*  
21 gene expression values were transformed and used to generate barplots in R. Count matrix  
22 data of all experiments were also downloaded and used for differential gene expression  
23 analysis, using the DESeq2 package [50] to statistically compare the mean expression level of  
24 each *TaPAO* gene between control and stress conditions. A heatmap was generated from  
25  $\log_2(\text{TPM}+1)$  transformed values of *TaPAO* genes over developmental stages using R

1 package “pheatmap”. Ternary plots were generated from the stress response data using the R  
2 package ggtern [51]. For this, genes with zero expression in all homoeologs were excluded.

### 3 **Detecting alternative splicing events among *TaPAOs***

4 Wheat genome sequences and annotations (IWGSC RefSeq v1.0) [52] were downloaded  
5 from <https://plants.ensembl.org/info/website/ftp/index.html>. In order to detect and visualize  
6 the alternative splice variants, we firstly downloaded RNAseq reads [SRP043554, 45] from  
7 <https://www.ebi.ac.uk>. RNAseq data belong to the wheat plants (‘Manitou’ cultivar) in three-  
8 leaf stage at normal (grown at 23°C for 4 weeks after germination) and cold stress (grown at  
9 23°C for 2 weeks followed by 4°C for another 2 weeks) conditions. After removing the low  
10 quality reads and inspecting for adapter sequences, the raw RNA sequence data from each  
11 sample were mapped to the wheat reference genome using HISAT2 and transcripts were  
12 assembled and merged using StringTie with default settings [53]. Normalization of  
13 abundance estimates as FPKM (fragments per kilobase of transcript per million mapped  
14 reads) values, differential gene and transcript expression analysis and graphical displaying of  
15 alternative splice variants were done using the “ballgown” package [54].

## 16 **Results**

### 17 **Identification of PAO proteins in common wheat, *T. urartu* and *Ae. tauschii***

18 BLASTP and the Hidden Markov Model (HMM) matrix of *Arabidopsis* and rice  
19 polyamine oxidase genes (Supplementary File 1) was used to search the amino oxidase  
20 proteins in common wheat, *Ae. tauschii* and *T. urartu* protein databases. In total, after  
21 verification of the identified sequences for the presence of each amino\_oxidase domain  
22 (Pfam: PF01593) or copper amine oxidase-catalytic domain, either alone or in combination  
23 with copper amine oxidase (N2 and/or N3-terminal), 30 *PAO* genes in *T. aestivum*, 6 *PAO*  
24 genes in *T. urartu* and 8 *PAO* genes in *Ae. tauschii* were identified. These genes were named  
25 *TaPAO1* to *TaPAO11*, followed by the name of the harbouring chromosome. For those



1 identified *PAO* genes which were orthologous to rice *PAOs*, the same numbers were assigned  
2 as for the rice *PAO* genes (Table 1).

#### 3 4 **Phylogeny and characterization of *PAO* genes**

5 The sequence length of TaPAO proteins ranged from 340 (TaPAO2-2A) to 585  
6 (TaPAO8-1A, TaPAO8-5B and TaPAOU<sub>n</sub>) amino acids. The average molecular weight was  
7 54.68 kDa, varying between 37.87 kDa (TaPAO2-2A) and 62.42 kDa (TaPAO8-5B). The  
8 isoelectric points (pI) of TaPAO members ranged from 5.02 (TaPAO2-2A) to 9.30 (TaPAO7-  
9 4A), with an average of 6.11, showing a weak acidity (Table 1). In order to identify the  
10 evolutionary relationships between PAO members, a phylogenetic tree of 56 PAO protein  
11 sequences belonging to *T. aestivum*, *T. urartu*, *A. tauschii*, *O. sativa* and *A. thaliana* was  
12 constructed using protein sequences based on the neighbor-joining method. The tree clustered  
13 the PAOs into seven clades (Fig. 2). Clade I contains four TaPAO11 homoeologs plus  
14 AetPAO11-7D of *Ae. tauschii*. Clade II was composed of TaPAO9 and TaPAO8  
15 homoeologs, TaPAOU<sub>n</sub>, and TaPAO2-2A. clade III was composed of TaPAO1 homoeologs  
16 plus AetPAO1-3D of *Ae. tauschii* together with OsPAO1 and AtPAO5. Clade IV contained  
17 TaPAO4 and five homoeologs together with their orthologs from *T. urartu*, *Ae. tauschii* and  
18 *O. sativa* plus AtPAO4. Clade-V had eight members including TaPAO3 homoeologs together  
19 with their orthologs from *T. urartu*, *Ae. tauschii* and *O. sativa* plus AtPAO2 and 3. Clade VI  
20 contained only AtPAO1, which appeared significantly different from other characterized  
21 PAOs. Clade VII was the biggest clade with 17 PAO proteins including TAPAO6 and 7  
22 homoeologs together with their *Ae. tauschii*, *T. urartu* orthologs. *O. sativa* OsPAO2,  
23 OsPAO6 and OsPAO7 proteins are also in the clade VII which are involved in the TC  
24 catabolism pathway (Fig. 1). Taken together, it seems that the identified wheat PAOs in the  
25 present study were not equally distributed among the different clades. Based on the retrieved

1 data from EnsemblPlants, *TaPAO5-2D*, *TaPAO6-7A*, *TaPAO7-4A*, *TaPAO11-7D* and all the  
2 *Ae. tauschii* genes produces multiple splice variant (Table 1).

### 3 **Analysis of chromosomal locations of *TaPAO* genes**

4 A physical map of the location of the *TaPAO* genes on the A, B, and D chromosomes is  
5 illustrated in Fig. 3. The *TaPAO* genes were mapped to 16 wheat chromosomes plus the  
6 unassembled (Un) part of the genome. Homoeologs were connected using central links.  
7 Homoeologous chromosomes were aligned close together and banded according to the  
8 general FISH patterns of p*Ta535-1* and (GAA)<sub>10</sub> probes. The *TaPAO* genes showed uneven  
9 distribution across the A, B, and D subgenomes with a higher density on homoeologous  
10 group 2, and absence on chromosomes 1B, 1D and 6A, 6B and 6D. *TaPAO3*, *TaPAO4* and  
11 *TaPAO5* showed a similar exon/intron structure (Fig. 4) and were located together on the  
12 distal end of the long arm of homoeologous group 2, with the same order. *TaPAO6* and  
13 *TaPAO11* were also located close together on homoeologous group 7A, 7B and 7D but did  
14 not show noticeable structural similarity.

### 15 **Structure, domain and motif analysis of *TaPAO* genes**

16 Exon–intron structural diversity within a gene family is an important clue for the  
17 evolutionary and functional analyses of gene family members. Gene structure, exons and  
18 introns were obtained for the identified 30 *TaPAO* genes to interrogate their genomic  
19 organization (Fig. 4A). Based on the wheat genome annotation, most *TaPAO* genes have  
20 introns in their structure and the number of exons varied from 1 (*TaPAO9-2A*, *TaPAO9-2B*,  
21 *TaPAO1-3A* and *TaPAO1-3B*) to 11 (*TaPAO5-2B*).

22 Protein domain analysis showed that most TaPAO members contained a typical  
23 amino\_oxidase catalytic domain (alone or in combination with DAO) plus an NAD/FAD  
24 binding domain, with only TaPAO4-2A/-2B/-2D lacking an NAD/FAD binding domain (Fig.  
25 4B). The MEME motif search tool identified six conserved motifs in TaPAO proteins (Fig.

1 5). The distribution patterns of these motifs in TaPAO proteins is shown in Fig. 4C. Motif 3  
2 is present in all TaPAO proteins except TaPAO2-2A. Motif 6 uniformly distributed to all  
3 TaPAOs except TaPAO11-7A/-7B and TaPAO2-2A. Motif 1 was available in all TaPAO  
4 except TaPAO2-2A, TaPAO1-3A/3B/3D, TaPAO9-2A/2B, TaPAO8-1A/5B/5D and TaPAO-  
5 Un. Motifs 2, 4 and 5 were present in all TaPAOs except TaPAO2-2A, TaPAO9-2A/2B,  
6 TaPAO8-1A/5B/5D and TaPAO-Un (Fig. 4C).

### 7 8 **Expression profile analysis of *TaPAOs* under developmental stages**

9 Analysis of expression profiles of *TaPAO* genes at various tissue and developmental  
10 stages using the expVIP data revealed that most *TaPAOs* are differentially expressed during  
11 developmental stages. For example, *TaPAO3-2A/2B*, *TaPAO4-2A/2B/2D* and *TaPAO5-*  
12 *2A/2B/2D* are highly expressed in specific tissues and developmental stages. The expression  
13 levels of *TaPAO11-7D* increased dramatically in some tissues such as leaf sheath, ligule,  
14 spike and spikelet during developmental stages. *TaPAO8-1A/5B/5D* genes also showed a  
15 clear tissue and developmental specific expression pattern and mainly downregulated in  
16 shoot, root and most parts of spike such as flower, ovary, anther, embryo and grain (Fig. 6).  
17 On the other hand, *TaPAO9-A/B/C*, *TaPAO7* and *TaPAO10* are less responsive to different  
18 conditions, tissues and developmental stages, although some homoeologs of these genes were  
19 active in some tissues and developmental stages (Fig. 6 and Fig. 7).

### 20 **Expression profiles of TaPAOs under biotic and abiotic stresses**

21 The differential expression of *TaPAOs* under biotic stresses (powdery mildew pathogen,  
22 *Zymoseptoria tritici*, stripe rust and *Fusarium graminearum* pathogen infections) and abiotic  
23 stresses (cold, heat, drought, heat and drought, phosphorus starvation and PEG) was assessed  
24 using the downloaded RNAseq data from expVIP. Results show that the expression of  
25 *TaPAO8*, *TaPAO3*, *TaPAO4*, *TaPAO5*, *TaPAO1-3A* and *TaPAOUn* was significantly

1 upregulated in the leaf of the ‘Manitou’ cultivar under cold stress. However, *TaPAO11-*  
2 *7A/7B/7D* were downregulated under the same condition (Fig. 7A). Expression profiles of  
3 *TaPAO-7D* were also slightly downregulated under phosphorus starvation (Fig. 7J).  
4 Furthermore, the transcript expressions of *TaPAO3*, *TaPAO4* and *TaPAO5* homoeologs were  
5 significantly increased under heat or under a combination of heat and drought stresses  
6 relative to normal condition in seedling leaves of the ‘TAM 107’ cultivar (Fig. 7D and E), but  
7 these genes were not significantly affected by drought stress (Fig. 7F). An expression pattern  
8 relatively similar to heat stress was observed for *TaPAO3*, *TaPAO4* and *TaPAO5*  
9 homoeologs under PEG treatment, although they showed less expression abundance  
10 compared to under heat stress conditions (Fig. 7H and G). Contrary to the cold (A), heat and  
11 drought (B) and heat (C) stresses, the expression of *TaPAO11* homoeologs was significantly  
12 increased under PEG treatment, especially in the ‘Giza 168’ cultivar. Interestingly, *TaPAO3*  
13 and *TaPAO4* genes were differentially expressed between ‘Giza 168’ and ‘Gemmiza 10’:  
14 while the transcript levels of these genes decreased under PEG in ‘Giza 168’, expression of  
15 some genes, such as *TaPAO4* significantly increased under similar condition in ‘Gemmiza  
16 10’.

17 Although some other genes and homoeologs were differentially expressed in other  
18 experiments, high variation in the data prevented reliable conclusions (Fig. 7K, L). For  
19 example, the expression of *TaPAO4* homoeologs was significantly increased in coleoptile  
20 sheath enclosed shoot tissue of common wheat ‘Chara’ three days after inoculation with *F.*  
21 *graminearum* (Fig. 7C). Some *TaPAOs* were also differentially expressed between non-  
22 inoculated and inoculated leaves of the ‘N9134’ cultivar seven days after stripe rust and  
23 powdery mildew stress treatment (Fig. 7K, L).

24 Expression changes of *TaPAO* genes were also shown in ternary plots for the first three  
25 experiments of Fig. 7M, N and O. Ternary plots for the other *TaPAO* genes are presented in

1 supplementary File 2, Fig. S1. Wheat ternary plots, provide an immediate view about the  
2 relative expression and abundance of homoeologous genes from each of the wheat three  
3 subgenomes. For example, the position of *TaPAO11* on the plot shows that it is dominantly  
4 expressed from the D subgenomes (supplementary file 2 Fig. S1, A-I and Fig. 7M), while  
5 *TaPAO1* is mainly expressed from the A subgenomes.

## 6 **Involvement of alternative splicing in *TaPAO* genes**

7 To explore alternative splicing in *TaPAO* genes, the RNAseq data (45.31 Gb) from the  
8 leaves of common wheat cultivar ‘Manitou’ exposed to normal (23°C) and cold stress (4°C)  
9 conditions (accession number: SRP043554) was downloaded and aligned to the recent wheat  
10 reference genome. The overall alignment rate was 93.61%. Transcripts were assembled using  
11 StringTie. Differential transcript expression analysis and graphical displaying of alternative  
12 splice variants were done using the “Ballgown” package [54]. Compared to the number of  
13 splice variants mentioned for each gene in EnsemblPlants, novel isoforms were identified for  
14 12 out of 30 *TaPAO* genes (Table 1). Because the wheat annotation file was used by  
15 StringTie during the assembly, most of the identified transcript should be due to alternative  
16 splicing. Structure and expression levels of distinct isoforms of the *TaPAO5-2D* gene under  
17 normal (23°C) and stress (4°C) conditions are illustrated in Fig. 8, where isoforms expressed  
18 at higher levels than the others are indicated by the darker color. Structure and expression  
19 levels of isoforms for the other *TaPAO* genes are presented in Supplementary File 3, Fig. S2.  
20 For most genes, different isoforms responded differently between normal and stress  
21 conditions (Fig. 8, supplementary file 3, Fig. S2). Among the *TaPAO* genes, we did not  
22 identify any isoforms that were available only in one condition.

23

## 1 Discussion

### 2 Structural characterization of polyamine oxidase genes (PAOs) in wheat

3 In the present study, we identified six *PAO* genes in diploid *T. urartu*, eight in diploid *Ae.*  
4 *tauschii* and 30 in hexaploid wheat (*T. aestivum*) by genome-wide approaches. We also  
5 structurally and functionally characterized the *TaPAO* genes using the publicly available  
6 RNAseq data. Previous studies have identified five PAO members in *A. thaliana* [55], seven  
7 in rice [4], two in barley [56], one in maize [57], seven in tomato [58], six in sweet orange  
8 [1], five in *Brachypodium distachyon* [59] and twelve in upland cotton [60]. AtPAO2~4, and  
9 OsPAO3~5, are believed to localize in peroxisomes based on possessing  
10 (S/A/C)(K/R/H)(L/M), in their C-termini which is a putative type -I peroxisomal targeting  
11 signal called PTS1 [4, 24]. Presence of SRL sequence in the C-termini of wheat TaPAO3 and  
12 TaPAO5 (Fig. 5) suggests that these proteins are localized in peroxisomes of wheat cells.

13 The identified *TaPAO* genes are distributed on 16 out of 21 wheat chromosomes plus the  
14 unassembled (Un) chromosome. As seen in the phylogenetic tree, each of the TaPAO  
15 homoeologous members aligned together in the same clade along with their *T. urartu* and *Ae.*  
16 *tauschii* orthologs (Fig. 2). The *TaPAO* genes generally showed an uneven distribution across  
17 the A, B, and D subgenomes. Similar biased distribution of gene family members is  
18 widespread. For example, *TaWD40*, *TaGST* and *TabZIP* family members are unevenly  
19 distributed across wheat chromosomes [61-63]. A high structural similarity of exon/intron  
20 structure between *TaPAO3*, *TaPAO4* and *TaPAO5*, and their close affinity at the distal end of  
21 the long arm of homoeologous group 2 suggest that a gene duplication event might be  
22 involved in the evolution of these genes [64].

## 1 **Expression profile analysis of *TaPAOs* during developmental stages**

2 Tissue expression profile analysis revealed that many *TaPAOs* are expressed in a  
3 redundant manner in different tissues during developmental stages in bread wheat (Figure 5),  
4 supporting the idea that PAOs are involved in various tissues during all developmental  
5 processes in all living organisms [2, 6, 65].

## 6 **Expression profiles analysis of *TaPAOs* in response to abiotic stress**

7 It is believed that PA molecules and PAOs also participate in responses to various abiotic  
8 stresses [6, 18, 65]. This has been specifically supported by the presence of putative *cis*-  
9 acting elements in the promoter region of polyamine biosynthetic genes including ADC and  
10 SAMDC which are regulated by transcription factors such as MYB, ABF and WRKY [66-  
11 68]. Concordantly, identification of consistently up- and downregulated expression patterns  
12 for a number of *TaPAOs* such as *TaPAO8*, *TaPAO4*, *TaPAO5* and *TaPAO11* under cold,  
13 drought or heat stresses suggest the involvement of *PAO* genes in multiple abiotic stress  
14 responses (Figure 6). Specifically, *TaPAOs* clearly responded to low and high temperatures.  
15 A similar temperature response has been suggested for *PAO* genes of cotton [60]. Similarly,  
16 *MdPAO2* expression was upregulated in apple fruit by elevating the CO<sub>2</sub> concentrations  
17 under low-temperature/low-O<sub>2</sub> storage [69]. In tomato, *SIPAOs* respond to abiotic stresses  
18 including heat, wounding, cold, drought, and salt [58].

19 In wheat, polyamine oxidases, were salt-induced in a salinity-tolerant genotype and  
20 showed higher expression compared with a salt-treated wild type, indicating that *TaPAOs*  
21 may play important roles in salinity tolerance as well [70]. *TaPAOs* have also been involved  
22 in osmotic stress: both abscisic acid pre-treatment and PEG induced osmotic stress, increased  
23 the Put, but decreased the Spm contents in wheat leaves, suggesting a connection between PA  
24 metabolism and abscisic acid signalling that leads to the controlled regulation and  
25 maintenance of Spd and Spm levels under osmotic stress in wheat seedlings [71]. Compared

1 to high temperature alone, high temperature plus exogenous application of Spm and high  
2 temperature plus Spd significantly increased grain weight of a heat-resistant wheat variety by  
3 19% and 5%, and of a heat-sensitive variety by 31% and 34%. Spm, Spd, and proline  
4 contents also increased significantly, while Put contents decreased during grain filling  
5 indicating that exogenous Spm and Spd could ameliorate heat damage during grain filling  
6 [72].

### 7 **Expression profile analysis of *TaPAOs* in response to biotic stress**

8 Only a few *TaPAOs* significantly responded to biotic stresses during disease  
9 development but this was genotype and stress-type dependent and varied between  
10 experiments. This is not surprising because gene expression in response to biotic stress has  
11 been shown to vary significantly based on environmental conditions. For example, *F.*  
12 *graminearum* produces a different gene expression pattern when infecting diverse tissue  
13 types or at different stages of infection in wheat [73]. Differential gene expression patterns  
14 could also be dependent on the specific isolates infecting host genotypes [74].

15 Experiment SRP060670 (i.e. Fig. 6B) was the only case where *TaPAO11* genes which  
16 are located on the long arm of homoeologous group 7, were not expressed under both normal  
17 and *Fusarium* stress conditions. This result suggests that the examined wheat genotype in this  
18 case might be a ditelocentric addition line CS-7EL(7D) where the 7DL chromosome arm has  
19 been substituted by 7EL arm of *Thinopyrum elongatum* [43], subsequently affecting gene  
20 expression.

### 21 **Differential response of homoeologous genes**

22 Differential response of homoeologous genes in allopolyploids is common when the  
23 plant is subjected to stresses. Here, unequal expression of homoeologs in response to stress  
24 was observed for some *TaPAO* genes such as *TaPAO11* under high temperature (Fig. 7D, E)  
25 and phosphorus starvation (Fig. 7J). Dong and Adams (2011) investigated the expression



1 patterns of homoeologs in response to heat, cold, drought and high salt stresses in  
2 allotetraploid cotton (*Gossypium hirsutum*) and observed variation in the contribution of  
3 homoeologous genes to abiotic stresses [75]. Similarly, some homoeologs of *Coffea*  
4 *canephora* which are involved in the mannitol pathway, presented unequal contributions in  
5 response to drought, salt and heat stresses [76]. While PA-related genes play crucial roles in  
6 stress response, the mechanisms of this PA reaction are not clear. Some evidence suggests  
7 that PAO enzymes respond to stress mainly by modulating the homeostasis of reactive  
8 oxygen species (ROS) [1], but a clear understanding of the biochemical functions of PAO  
9 proteins requires more experimental investigation.

#### 10 **Involvement of alternative splicing in *TaPAO* genes**

11 Among the 30 *TaPAO* genes, 15 produced more than one isoform while only 3 *TaPAO* genes  
12 had alternative splice variants in EnsemblPlants. In total, 30 alternative splice variants were  
13 identified in wheat cultivar ‘Manitou’. Therefore, a major proportion of *TaPAO* transcript  
14 diversity is due to alternative splicing. Observation of a large fraction of novel isoforms in  
15 RNAseq data is common. It is believed that about 60% of intron-containing genes are  
16 alternatively spliced in plants [77, 78]. For example, 63% of intron containing genes are  
17 alternatively spliced in soybean, and on average, each AS gene contain six to seven AS  
18 events [78]. In common wheat, 200, 3576 and 4056 genes exhibited significant alternative  
19 splice pattern changes in response to drought, heat, and a combination of heat and drought  
20 stresses, respectively, implying that expression patterns of alternative splice variants are  
21 significantly altered by heat rather than drought [79]. Moreover, if RNAseq data from samples  
22 belonging to different developmental stages and extreme conditions were to be examined, a  
23 higher proportion of alternatively spliced genes and splice variants would likely be identified.  
24 Alternative splicing might also be observed in different tissues and developmental stages [80].

1 But in the present study, all the *TaPAO* genes were constitutively alternatively spliced in all  
2 samples.

3

#### 4 **Conclusion**

5 We identified and characterized 30 *PAO* genes in common wheat that unevenly  
6 distributed across the wheat chromosomes. *TaPAO* genes were expressed redundantly in  
7 various tissues and developmental stages but a major fraction of *TaPAOs* responded  
8 significantly to abiotic stresses especially to temperature (i.e. heat and cold stresses). Some  
9 *TaPAOs* were also involved in responses to other stresses such as, powdery mildew, stripe  
10 rust and *Fusarium* infections in wheat. Overall, *TaPAOs* likely function in stress tolerances  
11 and play vital roles in different tissues and developmental stages. To understand the exact  
12 mechanisms of polyamine catabolism and biological functions of *TaPAOs*, more genetic and  
13 biochemical experiments are required. Our results provide a reference for further functional  
14 investigation of *TaPAOs* proteins.

#### 15 **Acknowledgements**

16 We are grateful to Annaliese Mason (Justus Liebig University, Germany) for her corrections  
17 to the manuscript. This work was supported by the University of Kurdistan.

18

#### 19 **Author Contribution Statement**

20 GM conceived and designed research. GM and FG conducted data analysis and wrote the  
21 manuscript.

22

23 **Conflict of interest** The authors declare that they have no competing interests.

24

25

## 1   **References**

- 2   1.     Liu J-H, Wang W, Wu H, Gong X, Moriguchi T. Polyamines function in stress  
3   tolerance: from synthesis to regulation. *Frontiers in Plant Science*. 2015;6:827.
- 4   2.     Rangan P, Subramani R, Kumar R, Singh AK, Singh R. Recent advances in  
5   polyamine metabolism and abiotic stress tolerance. *BioMed Research International*.  
6   2014;2014.
- 7   3.     Corpas FJ, Del Río LA, Palma JM. Plant peroxisomes at the crossroad of NO and  
8   H<sub>2</sub>O<sub>2</sub> metabolism. *Journal of integrative plant biology*. 2019;61:803-16.
- 9   4.     Ono Y, Kim DW, Watanabe K, Sasaki A, Niitsu M, Berberich T, et al. Constitutively  
10   and highly expressed *Oryza sativa* polyamine oxidases localize in peroxisomes and catalyze  
11   polyamine back conversion. *Amino Acids*. 2012;42:867-76.
- 12   5.     Cona A, Rea G, Angelini R, Federico R, Tavladoraki P. Functions of amine oxidases  
13   in plant development and defence. *Trends in Plant Science*. 2006;11:80-8.
- 14   6.     Alcázar R, Altabella T, Marco F, Bortolotti C, Reymond M, Koncz C, et al.  
15   Polyamines: molecules with regulatory functions in plant abiotic stress tolerance. *Planta*.  
16   2010;231:1237-49.
- 17   7.     Moschou P, Wu J, Cona A, Tavladoraki P, Angelini R, Roubelakis-Angelakis K. The  
18   polyamines and their catabolic products are significant players in the turnover of nitrogenous  
19   molecules in plants. *Journal of Experimental Botany*. 2012;63:5003-15.
- 20   8.     Angelini R, Cona A, Federico R, Fincato P, Tavladoraki P, Tisi A. Plant amine  
21   oxidases “on the move”: an update. *Plant Physiology and Biochemistry*. 2010;48:560-4.
- 22   9.     Mo H, Wang X, Zhang Y, Zhang G, Zhang J, Ma Z. Cotton polyamine oxidase is  
23   required for spermine and camalexin signalling in the defence response to *Verticillium*  
24   *dahliae*. *The Plant Journal*. 2015;83:962-75.
- 25   10.    Sengupta A, Chakraborty M, Saha J, Gupta B, Gupta K. Polyamines: osmoprotectants  
26   in plant abiotic stress adaptation. *Osmolytes and plants acclimation to changing*  
27   environment: emerging omics technologies: Springer; 2016. p. 97-127.

- 1 11. Agudelo-Romero P, Bortolotti C, Pais MS, Tiburcio AF, Fortes AM. Study of  
2 polyamines during grape ripening indicate an important role of polyamine catabolism. *Plant*  
3 *Physiology and Biochemistry*. 2013;67:105-19.
- 4 12. Moschou PN, Paschalidis KA, Roubelakis-Angelakis KA. Plant polyamine  
5 catabolism: the state of the art. *Plant Signaling and Behavior*. 2008;3:1061-6.
- 6 13. Shelp BJ, Deyman KL, DeEll JR, Bozzo GG. Polyamine homeostasis in apple fruit  
7 stored under multiple abiotic stresses. *Canadian Journal of Plant Science*. 2018;99:88-92.
- 8 14. Cui J, Pottosin I, Lamade E, Tcherkez G. What is the role of putrescine accumulated  
9 under potassium deficiency? *Plant, Cell and Environment*. 2020:1-17. doi:  
10 10.1111/pce.13740.
- 11 15. Sequera-Mutiozabal M, Tiburcio AF, Alcázar R. Drought Stress Tolerance in  
12 Relation to Polyamine Metabolism in Plants. In: Hossain MA, Wani SH, Bhattacharjee S,  
13 Burritt DJ, Tran L-SP, editors. *Drought Stress Tolerance in Plants, Vol 1: Physiology and*  
14 *Biochemistry*. Cham: Springer International Publishing; 2016. p. 267-86.
- 15 16. Fu X-Z, Chen C-W, Wang Y, Liu J-H, Moriguchi T. Ectopic expression of MdSPDS1  
16 in sweet orange (*Citrus sinensis* Osbeck) reduces canker susceptibility: involvement of H<sub>2</sub>  
17 O<sub>2</sub> production and transcriptional alteration. *BMC Plant Biology*. 2011;11:55.
- 18 17. Mitsuya Y, Takahashi Y, Berberich T, Miyazaki A, Matsumura H, Takahashi H, et al.  
19 Spermine signaling plays a significant role in the defense response of *Arabidopsis thaliana* to  
20 cucumber mosaic virus. *Journal of Plant Physiology*. 2009;166:626-43.
- 21 18. Yu Y, Zhou W, Zhou K, Liu W, Liang X, Chen Y, et al. Polyamines modulate  
22 aluminum-induced oxidative stress differently by inducing or reducing H<sub>2</sub>O<sub>2</sub> production in  
23 wheat. *Chemosphere*. 2018;212:645-53.
- 24 19. Ozawa R, Berteaux CM, Foti M, Narayana R, Arimura G-I, Muroi A, et al. Exogenous  
25 polyamines elicit herbivore-induced volatiles in lima bean leaves: involvement of calcium,  
26 H<sub>2</sub>O<sub>2</sub> and Jasmonic acid. *Plant and Cell Physiology*. 2009;50:2183-99.

- 1 20. Hatmi S, Trotel-Aziz P, Villaume S, Couderchet M, Clément C, Aziz A. Osmotic  
2 stress-induced polyamine oxidation mediates defence responses and reduces stress-enhanced  
3 grapevine susceptibility to *Botrytis cinerea*. *Journal of Experimental Botany*. 2014;65:75-88.
- 4 21. Xu X, Shi G, Jia R. Changes of polyamine levels in roots of *Sagittaria sagittifolia* L.  
5 under copper stress. *Environmental Science and Pollution Research*. 2012;19:2973-82.
- 6 22. Yang H, Shi G, Wang H, Xu Q. Involvement of polyamines in adaptation of  
7 *Potamogeton crispus* L. to cadmium stress. *Aquatic Toxicology*. 2010;100:282-8.
- 8 23. Cervelli M, Caro OD, Penta AD, Angelini R, Federico R, Vitale A, et al. A novel  
9 C-terminal sequence from barley polyamine oxidase is a vacuolar sorting signal. *The Plant*  
10 *Journal*. 2004;40:410-8.
- 11 24. Moschou PN, Sanmartin M, Andriopoulou AH, Rojo E, Sanchez-Serrano JJ,  
12 Roubelakis-Angelakis KA. Bridging the gap between plant and mammalian polyamine  
13 catabolism: a novel peroxisomal polyamine oxidase responsible for a full back-conversion  
14 pathway in *Arabidopsis*. *Plant Physiology*. 2008;147:1845-57.
- 15 25. Kim DW, Watanabe K, Murayama C, Izawa S, Niitsu M, Michael AJ, et al.  
16 Polyamine oxidase5 regulates *Arabidopsis* growth through thermospermine oxidase activity.  
17 *Plant Physiology*. 2014;165:1575-90.
- 18 26. Ahou A, Martignago D, Alabdallah O, Tavazza R, Stano P, Macone A, et al. A plant  
19 spermine oxidase/dehydrogenase regulated by the proteasome and polyamines. *Journal of*  
20 *Experimental Botany*. 2014;65:1585-603.
- 21 27. Fincato P, Moschou PN, Ahou A, Angelini R, Roubelakis-Angelakis KA, Federico R,  
22 et al. The members of *Arabidopsis thaliana* PAO gene family exhibit distinct tissue-and  
23 organ-specific expression pattern during seedling growth and flower development. *Amino*  
24 *Acids*. 2012;42:831-41.
- 25 28. Takahashi T, Kakehi J-I. Polyamines: ubiquitous polycations with unique roles in  
26 growth and stress responses. *Annals of Botany*. 2010;105:1-6.

- 1 29. Finn RD, Clements J, Arndt W, Miller BL, Wheeler TJ, Schreiber F, et al. HMMER  
2 web server: 2015 update. *Nucleic Acids Research*. 2015;43:W30-W8.
- 3 30. Spedaletti V, Polticelli F, Capodaglio V, Schininà ME, Stano P, Federico R, et al.  
4 Characterization of a lysine-specific histone demethylase from *Arabidopsis thaliana*.  
5 *Biochemistry*. 2008;47:4936–47.
- 6 31. Yu Y, Ouyang Y, Yao W. shinyCircos: an R/Shiny application for interactive creation  
7 of Circos plot. *Bioinformatics* 2017;34:1229–31.
- 8 32. Gasteiger E, Hoogland C, Gattiker A, Duvaud Se, Wilkins MR, Appel RD, et al.  
9 Protein Identification and Analysis Tools on the ExPASy Server. In: Walker JM, editor. *The*  
10 *Proteomics Protocols Handbook*. Totowa, NJ: Humana Press; 2005. p. 571-607.
- 11 33. Hu B, Jin J, Guo A, Zhang H, Luo J, Gao G. GSDS 2.0: An upgraded gene feature  
12 visualization server. *Bioinformatics*. 2015;31:1296–7.
- 13 34. El-Gebali S, Mistry J, Bateman A, Eddy SR, Luciani A, Potter SC, et al. The Pfam  
14 protein families database in 2019. *Nucleic Acids Research*. 2019;47:D427-D32.
- 15 35. Bailey TL, Boden M, Buske FA, Frith M, Grant CE, Clementi L, et al. MEME  
16 SUITE: tools for motif discovery and searching. *Nucleic Acids Research*. 2009;37:W202-  
17 W8.
- 18 36. Chen C, Chen H, He Y, Xia R. TBtools, a Toolkit for Biologists integrating various  
19 biological data handling tools with a user-friendly interface. *bioRxiv* 2018:289660.
- 20 37. Waterhouse AM, Procter JB, Martin DM, Clamp M, Barton G. Jalview Version 2—a  
21 multiple sequence alignment editor and analysis workbench. *Bioinformatics*.  
22 2009;25(9):1189-91.
- 23 38. Bodenhofer U, Bonatesta E, Horejš-Kainrath C, Hochreiter S. msa: an R package for  
24 multiple sequence alignment. *Bioinformatics*. 2015;31(24):3997-9.
- 25 39. Paradis E, Schliep K. ape 5.0: an environment for modern phylogenetics and  
26 evolutionary analyses in R. *Bioinformatics*. 2019;35(3):526-8.

- 1 40. Yu G, Smith DK, Zhu H, Guan Y, Lam TTY, Evolution. ggtree: an R package for  
2 visualization and annotation of phylogenetic trees with their covariates and other associated  
3 data. *Methods in Ecology*. 2017;8:28-36.
- 4 41. Borrill P, Ramirez-Gonzalez R, Uauy C. expVIP: a customizable RNA-seq data  
5 analysis and visualization platform. *Plant Physiology*. 2016;170:2172–86.
- 6 42. Ramírez-González RH, Borrill P, Lang D, Harrington SA, Brinton J, Venturini L, et  
7 al. The transcriptional landscape of polyploid wheat. *Science*. 2018;361(6403):eaar6089.
- 8 43. Gou L, Hattori J, Fedak G, Balcerzak M, Sharpe A, Visendi P, et al. Development and  
9 validation of *Thinopyrum elongatum*–expressed molecular markers specific for the long arm  
10 of chromosome 7E. *Crop Science*. 2016;56:354-64.
- 11 44. Powell JJ, Fitzgerald TL, Stiller J, Berkman PJ, Gardiner DM, Manners JM, et al. The  
12 defence-associated transcriptome of hexaploid wheat displays homoeolog expression and  
13 induction bias. *Plant biotechnology journal*. 2017;15:533-43. Epub 2016/10/14. doi:  
14 10.1111/pbi.12651. PubMed PMID: 27735125; PubMed Central PMCID:  
15 PMC5362679.
- 16 45. Li Q, Zheng Q, Shen W, Cram D, Fowler DB, Wei Y, et al. Understanding the  
17 biochemical basis of temperature-induced lipid Pathway adjustments in plants. *The Plant*  
18 *Cell*. 2015;27:86-103.
- 19 46. Rudd JJ, Kanyuka K, Hassani-Pak K, Derbyshire M, Andongabo A, Devonshire J, et  
20 al. Transcriptome and metabolite profiling of the infection cycle of *Zymoseptoria tritici* on  
21 wheat reveals a biphasic interaction with plant immunity involving differential pathogen  
22 chromosomal contributions and a variation on the hemibiotrophic lifestyle definition. *Plant*  
23 *Physiology*. 2015;167:1158-85. doi: 10.1104/pp.114.255927 %J *Plant Physiology*.
- 24 47. Liu Z, Xin M, Qin J, Peng H, Ni Z, Yao Y, et al. Temporal transcriptome profiling  
25 reveals expression partitioning of homeologous genes contributing to heat and drought  
26 acclimation in wheat (*Triticum aestivum* L.). *BMC Plant Biology*. 2015;15:152.
- 27 48. Oono Y, Kobayashi F, Kawahara Y, Yazawa T, Handa H, Itoh T, et al.  
28 Characterisation of the wheat (*Triticum aestivum* L.) transcriptome by de novo assembly for

- 1 the discovery of phosphate starvation-responsive genes: gene expression in Pi-stressed wheat.  
2 BMC Genomics. 2013;14:77. doi: 10.1186/1471-2164-14-77.
- 3 49. Zhang H, Yang Y, Wang C, Liu M, Li H, Fu Y, et al. Large-scale transcriptome  
4 comparison reveals distinct gene activations in wheat responding to stripe rust and powdery  
5 mildew. BMC Genomics. 2014;15:898.
- 6 50. Love MI, Huber W, Anders S. Moderated estimation of fold change and dispersion  
7 for RNA-seq data with DESeq2. Genome Biology. 2014;15:550.
- 8 51. Hamilton NE, Ferry M. ggtern: ternary diagrams using ggplot2. Journal of Statistical  
9 Software. 2018;87:1–17.
- 10 52. Appels R, Eversole K, Feuillet C, Keller B, Rogers J, Stein N, et al. Shifting the limits  
11 in wheat research and breeding using a fully annotated reference genome. Science.  
12 2018;361:eaar7191.
- 13 53. Perteu M, Kim D, Perteu GM, Leek JT, Salzberg SL. Transcript-level expression  
14 analysis of RNA-seq experiments with HISAT, StringTie and Ballgown. Nature Protocols.  
15 2016;11:1650.
- 16 54. Frazee AC, Perteu G, Jaffe AE, Langmead B, Salzberg SL, Leek JT. Ballgown  
17 bridges the gap between transcriptome assembly and expression analysis. Nature  
18 Biotechnology. 2015;33:243.
- 19 55. Fincato P, Moschou PN, Spedaletti V, Tavazza R, Angelini R, Federico R, et al.  
20 Functional diversity inside the *Arabidopsis* polyamine oxidase gene family. Journal of  
21 Experimental Botany. 2011;62:1155-68.
- 22 56. Cervelli M, Cona A, Angelini R, Polticelli F, Federico R, Mariottini P. A barley  
23 polyamine oxidase isoform with distinct structural features and subcellular localization.  
24 European Journal of Biochemistry. 2001;268:3816-30.
- 25 57. Cervelli M, Tavladoraki P, Di Agostino S, Angelini R, Federico R, Mariottini P.  
26 Isolation and characterization of three polyamine oxidase genes from *Zea mays*. Plant  
27 Physiology and Biochemistry. 2000;38:667-77.



- 1 58. Hao Y, Huang B, Jia D, Mann T, Jiang X, Qiu Y, et al. Identification of seven  
2 polyamine oxidase genes in tomato (*Solanum lycopersicum* L.) and their expression profiles  
3 under physiological and various stress conditions. *Journal of Plant Physiology*. 2018;228:1-  
4 11.
- 5 59. Takahashi Y, Ono K, Akamine Y, Asano T, Ezaki M, Mouri I. Highly-expressed  
6 polyamine oxidases catalyze polyamine back conversion in *Brachypodium distachyon*.  
7 *Journal of Plant Research*. 2018;131:341-8.
- 8 60. Cheng X-Q, Zhu X-F, Tian W-G, Cheng W-H, Sun J, Jin S-X, et al. Genome-wide  
9 identification and expression analysis of polyamine oxidase genes in upland cotton  
10 (*Gossypium hirsutum* L.). *Plant Cell, Tissue and Organ Culture*. 2017;129:237-49.
- 11 61. Hu R, Xiao J, Gu T, Yu X, Zhang Y, Chang J, et al. Genome-wide identification and  
12 analysis of WD40 proteins in wheat (*Triticum aestivum* L.). *BMC Genomics*. 2018;19:803.
- 13 62. Wang R, Ma J, Zhang Q, Wu C, Zhao H, Wu Y, et al. Genome-wide identification  
14 and expression profiling of glutathione transferase gene family under multiple stresses and  
15 hormone treatments in wheat (*Triticum aestivum* L.). *BMC Genomics*. 2019;20:1-15.
- 16 63. Li X, Gao S, Tang Y, Li L, Zhang F, Feng B, et al. Genome-wide identification and  
17 evolutionary analyses of bZIP transcription factors in wheat and its relatives and expression  
18 profiles of anther development related TabZIP genes. *BMC Genomics*. 2015;16:976.
- 19 64. Huo N, Zhang S, Zhu T, Dong L, Wang Y, Mohr T, et al. Gene duplication and  
20 evolution dynamics in the homeologous regions harboring multiple prolamin and resistance  
21 gene families in hexaploid wheat. *Frontiers in Plant Science*. 2018;9:673.
- 22 65. Yu Z, Jia D, Liu T. Polyamine oxidases play various roles in plant development and  
23 abiotic stress tolerance. *Plants*. 2019;8:184.
- 24 66. Basu S, Roychoudhury A, Sengupta DN. Identification of trans-acting factors  
25 regulating SamDC expression in *Oryza sativa*. *Biochemical and Biophysical Research*  
26 *Communications*. 2014;445:398-403.

- 1 67. Gong X, Zhang J, Hu J, Wang W, Wu H, Zhang Q, et al. FcWRKY 70, a WRKY  
2 protein of *Fortunella crassifolia*, functions in drought tolerance and modulates putrescine  
3 synthesis by regulating arginine decarboxylase gene. *Plant, Cell and Environment*.  
4 2015;38:2248-62.
- 5 68. Sun P, Zhu X, Huang X, Liu J-H. Overexpression of a stress-responsive MYB  
6 transcription factor of *Poncirus trifoliata* confers enhanced dehydration tolerance and  
7 increases polyamine biosynthesis. *Plant Physiology and Biochemistry*. 2014;78:71-9.
- 8 69. Brikis CJ, Zarei A, Chiu GZ, Deyman KL, Liu J, Trobacher CP, et al. Targeted  
9 quantitative profiling of metabolites and gene transcripts associated with 4-aminobutyrate  
10 (GABA) in apple fruit stored under multiple abiotic stresses. *Horticulture Research*.  
11 2018;5:1-14.
- 12 70. Xiong H, Guo H, Xie Y, Zhao L, Gu J, Zhao S, et al. RNAseq analysis reveals  
13 pathways and candidate genes associated with salinity tolerance in a spaceflight-induced  
14 wheat mutant. *Scientific Reports*. 2017;7(1):1-13.
- 15 71. Pál M, Tajti J, Szalai G, Peeva V, Végh B, Janda T. Interaction of polyamines,  
16 abscisic acid and proline under osmotic stress in the leaves of wheat plants. *Scientific*  
17 *Reports*. 2018;8(1):12839. doi: 10.1038/s41598-018-31297-6.
- 18 72. Jing J, Guo S, Li Y, Li W. The alleviating effect of exogenous polyamines on heat  
19 stress susceptibility of different heat resistant wheat (*Triticum aestivum* L.) varieties.  
20 *Scientific Reports*. 2020;10(1):7467.
- 21 73. Zhang X-W, Jia L-J, Zhang Y, Jiang G, Li X, Zhang D, et al. In planta stage-specific  
22 fungal gene profiling elucidates the molecular strategies of *Fusarium graminearum* growing  
23 inside wheat coleoptiles. *The Plant Cell*. 2012;24:5159-76.
- 24 74. Hofstad AN, Nussbaumer T, Akhunov E, Shin S, Kugler KG, Kistler HC, et al.  
25 Examining the transcriptional response in wheat Fhb1 near-isogenic lines to *Fusarium*  
26 *graminearum* infection and deoxynivalenol treatment. *The Plant Genome*. 2016;9:10.3835.

- 1 75. Dong S, Adams KL. Differential contributions to the transcriptome of duplicated  
2 genes in response to abiotic stresses in natural and synthetic polyploids. *New Phytologist*.  
3 2011;190:1045-57.
- 4 76. de Carvalho K, Petkowicz CL, Nagashima GT, Bessalho Filho JC, Vieira LG,  
5 Pereira LF, et al. Homeologous genes involved in mannitol synthesis reveal unequal  
6 contributions in response to abiotic stress in *Coffea arabica*. *Molecular Genetics and*  
7 *Genomics*. 2014;289:951-63.
- 8 77. Reddy AS, Marquez Y, Kalyna M, Barta A. Complexity of the alternative splicing  
9 landscape in plants. *Plant Cell*. 2013;25:3657–83.
- 10 78. Shen Y, Zhou Z, Wang Z, Li W, Fang C, Wu M, et al. Global dissection of alternative  
11 splicing in paleopolyploid soybean. *The Plant Cell*. 2014;26:996-1008.
- 12 79. Liu Z, Qin J, Tian X, Xu S, Wang Y, Li H, et al. Global profiling of alternative  
13 splicing landscape responsive to drought, heat and their combination in wheat (*Triticum*  
14 *aestivum* L.). *Plant biotechnology journal*. 2018;16:714-26. Epub 2017/08/24. PubMed  
15 PMID: 28834352; PubMed Central PMCID: PMC5814593.
- 16 80. Yoshimura K, Yabuta Y, Ishikawa T, Shigeoka S. Identification of a cis element for  
17 tissue-specific alternative splicing of chloroplast ascorbate peroxidase pre-mRNA in higher  
18 plants. *Journal of Biological Chemistry*. 2002;277:40623-32.
- 19  
20  
21  
22  
23  
24  
25  
26  
27

1  
2  
3  
4  
5  
6  
7  
8  
9  
10  
11  
12  
13  
14

**Tables and figure legends**

**Table 1** Information and physicochemical characteristics of *PAO* genes in bread wheat, *T.*

*urartu* and *Ae. tauschii*. Notes: AA, amino acid sequence length; MW, molecular weight; pI,

isoelectric point. ASN: alternative splice variants. “1” indicates only a single transcript. \*:

wheat *PAO* genes that are confidently orthologous with the corresponding rice *PAOs*. ASN:

alternative splice variants from EnsemblPlants. **D**: gene direction, ‘+’: forward. ‘-’: reverse.

**ASN\*\***: alternative splice variants identified in ‘Manitou’ cultivar from experiment

SRP043554.

| Species             | Name        | Transcript ID        | AA  | MW (kDa) | pI   | ASN | D | ASN** |
|---------------------|-------------|----------------------|-----|----------|------|-----|---|-------|
| <i>T. urartu</i>    | TuPAO5      | TRIUR3_11268-T1      | 520 | 57376.68 | 5.34 | 1   | + | -     |
|                     | TuPAO9      | TRIUR3_14057-T1      | 504 | 56367.99 | 6.45 | 1   | + | -     |
|                     | TuPAO6      | TRIUR3_12020-T1      | 454 | 50979.07 | 7.12 | 1   | + | -     |
|                     | TuPAO3      | TRIUR3_18876-T1      | 484 | 53632.17 | 5.34 | 1   | - | -     |
|                     | TuPAO4      | TRIUR3_11269-T1      | 520 | 57376.68 | 5.34 | 1   | + | -     |
|                     | TuPAO10     | TRIUR3_14834-T1      | 490 | 55178.33 | 5.36 | 1   | + | -     |
| <i>Ae. tauschii</i> | AetPAO4-2D  | AET2Gv21199400.1     | 490 | 53358.12 | 5.36 | 10  | + | -     |
|                     | AetPAO3-2D  | AET2Gv21031900.5     | 513 | 57023.23 | 5.51 | 36  | - | -     |
|                     | AetPAO5-2D  | AET2Gv21199100.12    | 492 | 54373.33 | 5.51 | 15  | + | -     |
|                     | AetPAO9-4D  | AET4Gv20654900.7     | 526 | 59025.88 | 6.55 | 12  | - | -     |
|                     | AetPAO6-7D  | AET7Gv21301800.1     | 498 | 55934.48 | 5.99 | 6   | - | -     |
|                     | AetPAO11-7D | AET7Gv20928100.8     | 503 | 56533.91 | 5.64 | 11  | - | -     |
|                     | AetPAO1-3D  | AET3Gv20612000.2     | 517 | 55184.35 | 5.09 | 3   | + | -     |
|                     | AetPAO10-4D | AET4Gv20866800.1     | 245 | 26562.27 | 5.79 | 10  | + | -     |
|                     | TaPAO8-1A   | TraesCS1A02G407600.1 | 585 | 61964.34 | 7.93 | 1   | + | 3     |
|                     | TaPAO8-5B   | TraesCS5B02G529400.1 | 585 | 62050.42 | 8.40 | 1   | - | 4     |
|                     | TaPAO8-5D   | TraesCS5D02G528500.1 | 582 | 61688.97 | 7.59 | 1   | - | 2     |
|                     | TaPAO10-4B  | TraesCS4B02G385300.1 | 481 | 53676.73 | 5.76 | 1   | - | 1     |
|                     | TaPAO10-5A  | TraesCS5A02G549600.1 | 495 | 55509.74 | 5.60 | 1   | + | 1     |

|                    |            |                      |     |          |      |   |   |   |
|--------------------|------------|----------------------|-----|----------|------|---|---|---|
|                    | TaPAO11-7A | TraesCS7A02G378800.1 | 457 | 51891.59 | 5.55 | 1 | - | 1 |
|                    | TaPAO11-7B | TraesCS7B02G280700.1 | 477 | 54210.02 | 5.55 | 1 | - | 2 |
|                    | TaPAO11-7D | TraesCS7D02G375700.1 | 503 | 56533.91 | 5.64 | 2 | - | 2 |
|                    | TaPAO2-2A  | TraesCS2A02G053400.1 | 340 | 37651.87 | 5.02 | 1 | - | 1 |
|                    | TaPAO3-2A* | TraesCS2A02G467300.1 | 484 | 53646.20 | 5.34 | 1 | - | 2 |
|                    | TaPAO3-2B* | TraesCS2B02G490100.1 | 484 | 53604.16 | 5.34 | 1 | - | 3 |
|                    | TaPAO3-2D* | TraesCS2D02G467300.1 | 484 | 53632.17 | 5.34 | 1 | - | 2 |
| <i>T. aestivum</i> | TaPAO4-2A* | TraesCS2A02G548200.1 | 490 | 53266.07 | 5.37 | 1 | + | 2 |
|                    | TaPAO4-2B* | TraesCS2B02G579100.1 | 490 | 53312.05 | 5.35 | 1 | + | 1 |
|                    | TaPAO4-2D* | TraesCS2D02G549300.1 | 540 | 58748.37 | 5.64 | 1 | + | 2 |
|                    | TaPAO5-2A* | TraesCS2A02G548100.1 | 487 | 53768.67 | 5.44 | 1 | + | 4 |
|                    | TaPAO5-2B* | TraesCS2B02G579000.1 | 526 | 57604.88 | 5.45 | 1 | + | 2 |
|                    | TaPAO5-2D* | TraesCS2D02G549200.1 | 492 | 54373.33 | 5.51 | 3 | + | 4 |
|                    | TaPAO6-7A* | TraesCS7A02G539200.1 | 508 | 56928.63 | 6.58 | 2 | - | 2 |
|                    | TaPAO6-7B* | TraesCS7B02G461800.1 | 495 | 55486.12 | 6.40 | 1 | + | 1 |
|                    | TaPAO6-7D* | TraesCS7D02G524900.1 | 498 | 55946.45 | 5.99 | 1 | + | 1 |
|                    | TaPAO9-2A  | TraesCS2A02G159500.1 | 474 | 49845.89 | 6.27 | 1 | + | 1 |
|                    | TaPAO9-2B  | TraesCS2B02G185100.1 | 471 | 49635.65 | 6.11 | 1 | + | 1 |
|                    | TaPAO1-3A* | TraesCS3A02G250700.1 | 510 | 54902.17 | 5.49 | 1 | + | 1 |
|                    | TaPAO1-3B* | TraesCS3B02G280200.1 | 507 | 54518.62 | 5.22 | 1 | + | 1 |
|                    | TaPAO1-3D* | TraesCS3D02G251100.1 | 491 | 52509.23 | 5.07 | 1 | + | 1 |
|                    | TaPAO7-4A  | TraesCS4A02G039600.1 | 468 | 52554.66 | 9.30 | 3 | + | 3 |
|                    | TaPAO7-4B  | TraesCS4B02G265900.1 | 493 | 55334.93 | 7.23 | 1 | - | 1 |
|                    | TaPAO7-4D  | TraesCS4D02G265800.1 | 493 | 55354.78 | 6.52 | 1 | - | 1 |
|                    | TaPAOUn    | TraesCSU02G062000.1  | 585 | 61995.31 | 7.58 | 1 | + | 1 |

1

2

3

#### 4 **Figure legends**

5 **Fig. 1** Polyamine biosynthesis in plants. ADC, arginine decarboxylase; AIH, agmatine

6 iminohydrolase; CPA, N-carbamoyl putrescine amidohydrolase; dcSAM: decarboxylated S-

7 adenosylmethionine; SAM: S-adenosylmethionine; SAMDC: S-adenosylmethionine

8 decarboxylase; SPDS: spermidine synthase; SPMS: spermine synthase; TSPMS:

9 thermospermine synthase; spermidine synthase: SPDS; spermine synthase: SPMS; PAO:

10 polyamine oxidase. The donor of the aminopropyl groups is dc-SAM, which is formed by

11 decarboxylation of SAM, through an enzymatic reaction catalyzed by SAMDC. The

12 aminopropyltransferases donating aminopropyl residue to Put or Spd for production of Spd or

13 Spm are SPDS and SPMS.

1

2 **Fig. 2** Phylogenetic tree of PAO proteins from *T. aestivum*, *T. urartu* and *Ae. tauschii*, *O.*  
3 *sativa* and *A. thaliana*.

4

5 **Fig. 3** Chromosomal location of PAO genes on wheat chromosomes. Homoeologous genes  
6 were mapped to 16 wheat chromosomes (composed of A, B, and D subgenomes) plus one  
7 unassembled chromosome (Un) using shinyCircos. Homoeologs were connected using  
8 central links. Chromosome were banded according to pTa535-1 (red bands) and (GAA)<sub>10</sub>  
9 (blue bands) FISH patterns. Chromosome number is indicated outside the outer circle.

10

11 **Fig. 4** Gene structure, protein domain and motif analysis of *TaPAOs*. A) Exon–intron  
12 structures of *TaPAO* genes. B) Distribution of conserved domains within *TaPAO* proteins. C)  
13 Distribution of all motifs identified by MEME.

14 **Fig. 5** Multiple sequence alignment of wheat and rice PAO protein sequences. The locations  
15 and logos of the conserved domains of *TaPAO* genes identified by MEM are indicated.

16 Searching in Pfam identified domains 1, 2, 3 and 4 as Flavin containing amine  
17 oxidoreductase; domain 6 as NAD\_binding\_8 and no result was found for domain 5.

18

19 **Fig. 6** Log<sub>2</sub> based expression levels for several *TaPAO* genes in different tissues during  
20 developmental stages. TPM values belong to Ramírez-González, Borrill (42) and retrieved  
21 from [www.wheat-expression.com](http://www.wheat-expression.com).

22

23 **Fig. 7** Barplots of the transcript expression rates (mean ± sd) of *TaPAO* genes in common  
24 wheat under different stress conditions including A) Leaf of ‘Manitou’ cultivar under normal  
25 (control) and cold stress conditions. B) ‘Chinese Spring’ cultivar 4 days after mock  
26 inoculation or inoculation with *F. graminearum*. C) Coleoptile-sheath-enclosed shoot tissue

1 of common wheat ‘Chara’, 3 days after mock inoculation or inoculation with *F.*  
2 *graminearum*. **D, E and F**) seedlings of ‘TAM 107’ cultivar under a combined of heat and  
3 drought stress (40 °C and 20 % PEG-6000) and normal (22 °C) conditions (**D**) heat (40 °C)  
4 and normal (22 °C) conditions (**E**) and drought (20 % PEG-6000) and control (22 °C)  
5 conditions (**F**). **G and H**) Leaf tissue of ‘Ciza 168’ and ‘Gemmiza 10’ under control and  
6 PEG treatment conditions. **I**) Leaves of the “Riband” cultivar after mock inoculation (control)  
7 or inoculation with *Zymoseptoria tritici* isolate IPO323. **J**) Seedlings of the “Chinese Spring”  
8 cultivar 10 days after phosphorus starvation and under control conditions. **K**) Seedlings of the  
9 “N9134” cultivar 7 days after mock inoculation or after inoculation with powdery mildew. **L**)  
10 Seedlings of the “N9134” cultivar seven days after mock inoculation or inoculation with  
11 stripe rust. In each experiment ‘\*’, ‘\*\*’ and ‘\*\*\*’ indicate statistically significant differences  
12 from control at 0.05, 0.01 and 0.005 significant levels, based on DESeq2 adjusted p-values.  
13 **M, N and O**) Ternary plot showing relative expression abundance of *TaPAO* genes under  
14 different stress conditions. In each ternary plot, a circle or a triangles reflects the relative  
15 contribution of homoeologs of a gene under the normal or stress condition respectively, and  
16 their sizes indicate the total expression in TPM. The data code for each study and the  
17 evaluated wheat cultivar are also indicated at the top (in barplots) or bottom (in ternary plots)  
18 of the subfigures.

19  
20

21 **Fig. 8** Expression levels in FPKM and the structure of distinct isoforms of the three *TaPAO5-*  
22 *2D* genes under normal (23°C) and stress (4°C) conditions from the SRP043554 experiment  
23 (A). Expression levels of isoforms are shown by barplots ± standard deviations (B) and in  
24 varying shades of yellow (C). Boxes represent exons and horizontal lines connecting exons  
25 represent introns.

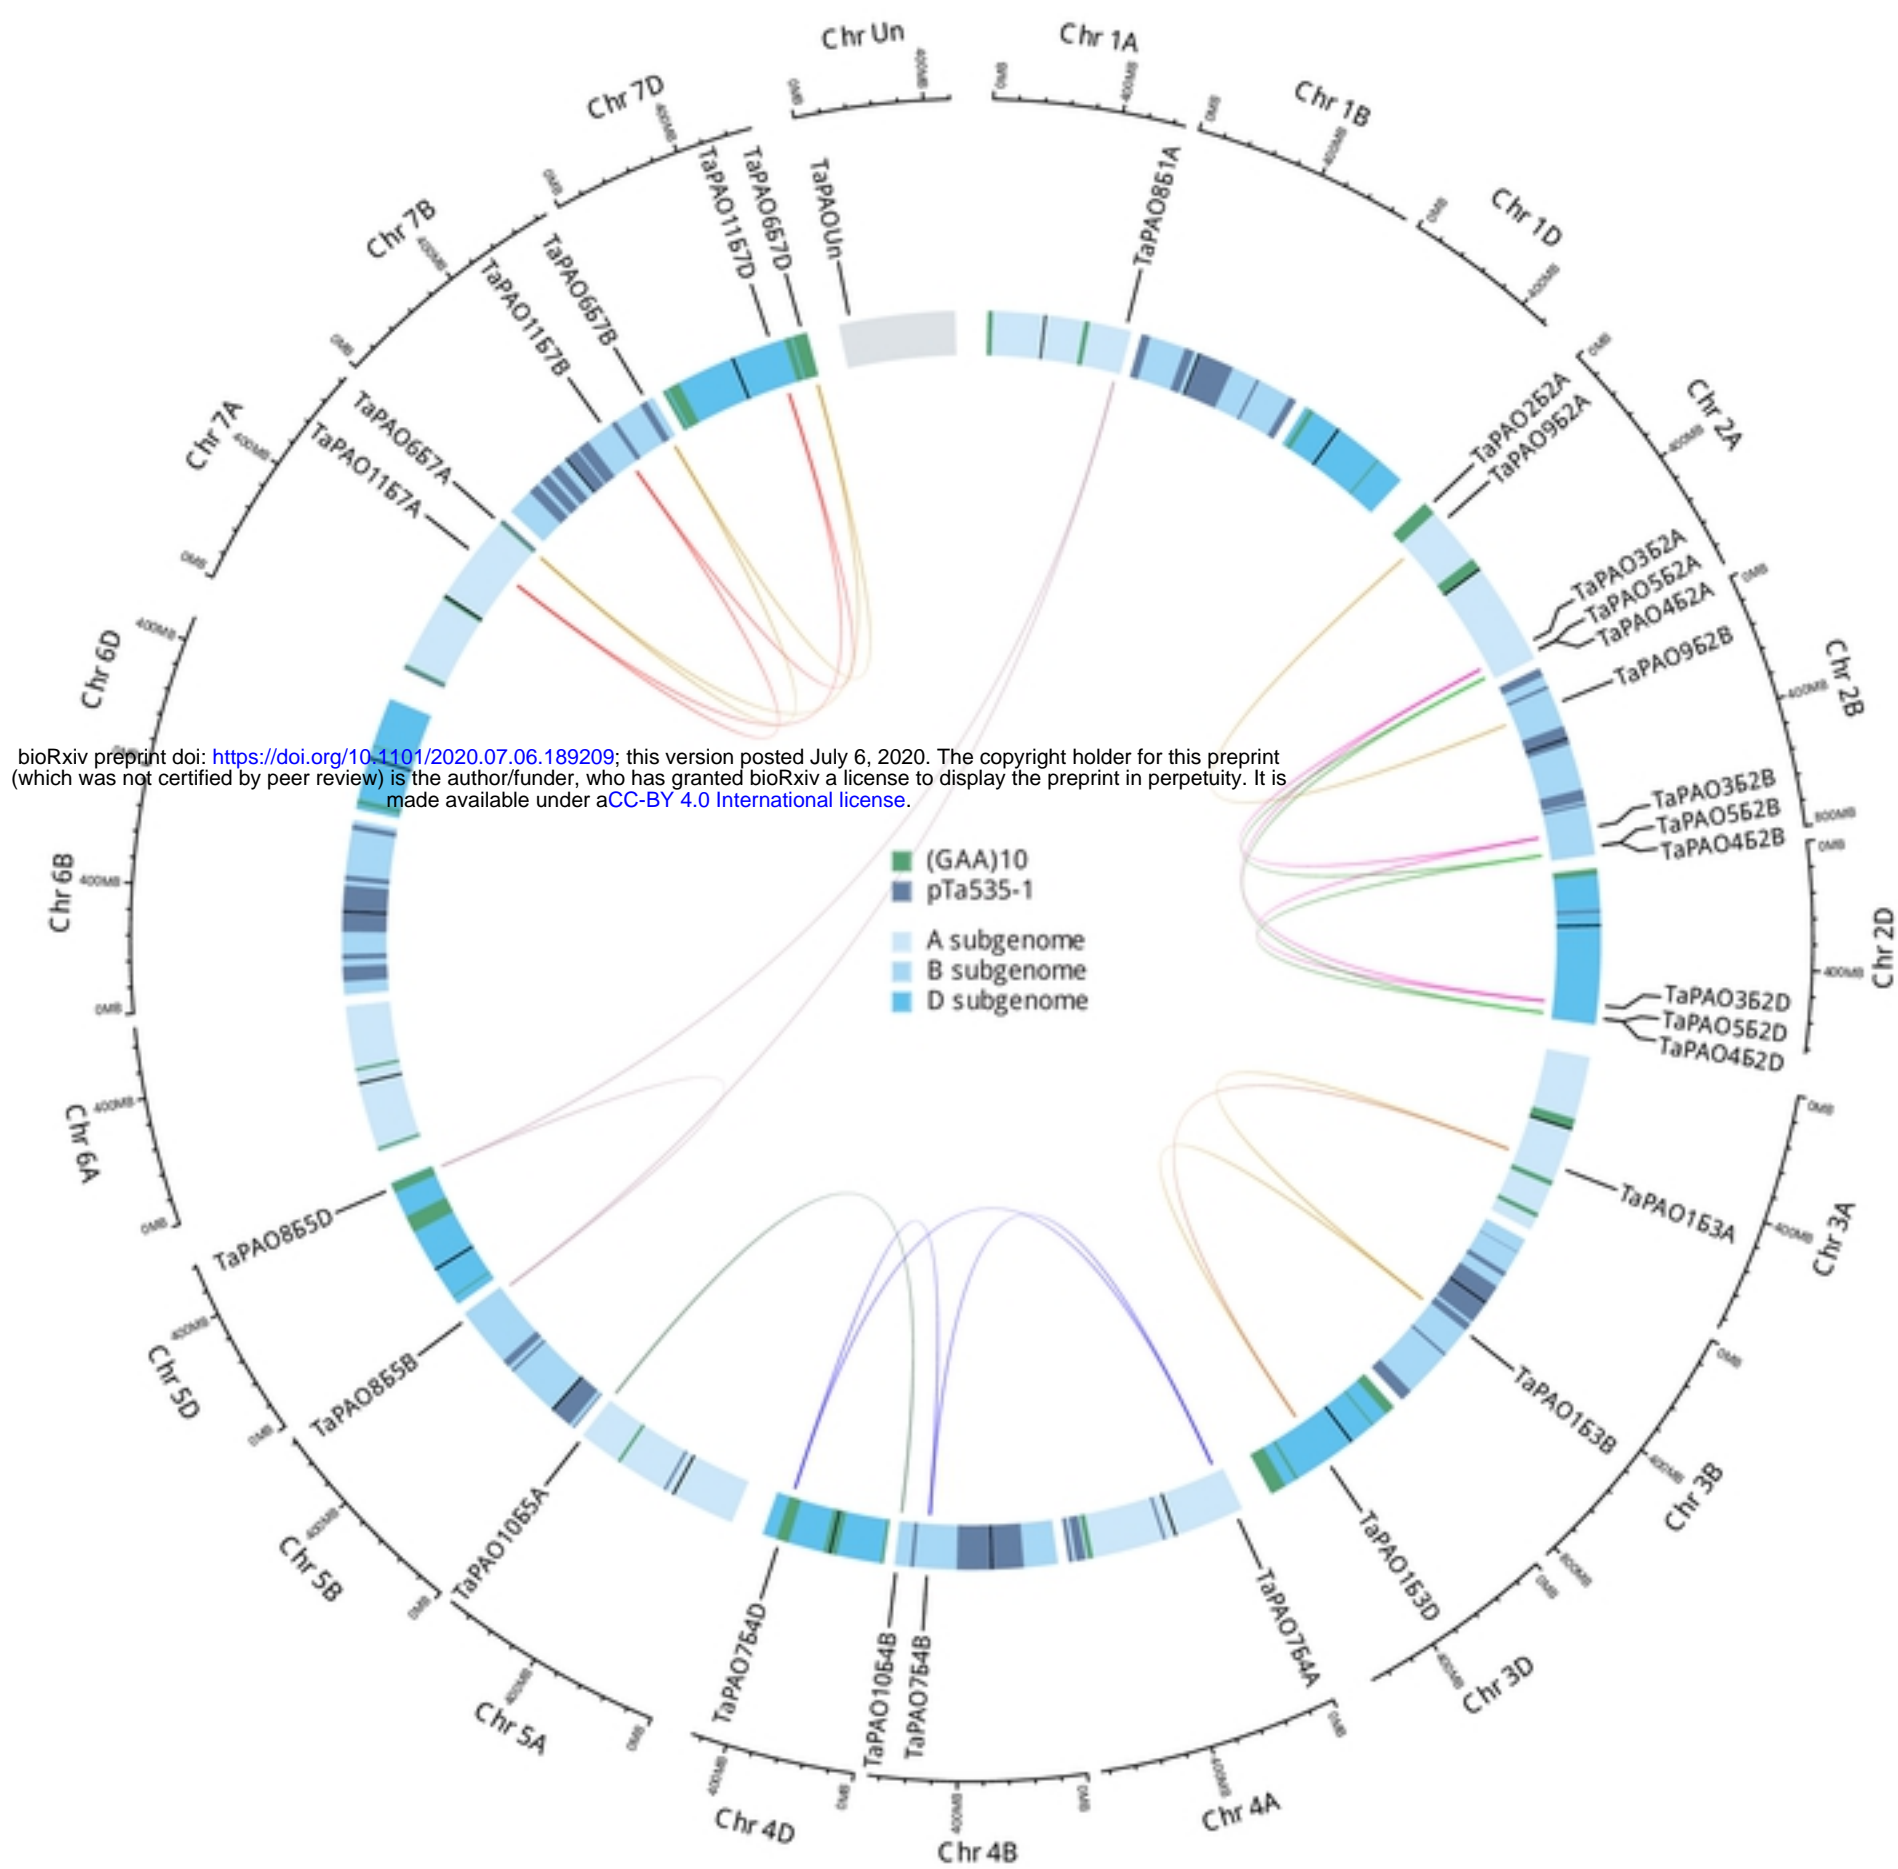

Figure 3



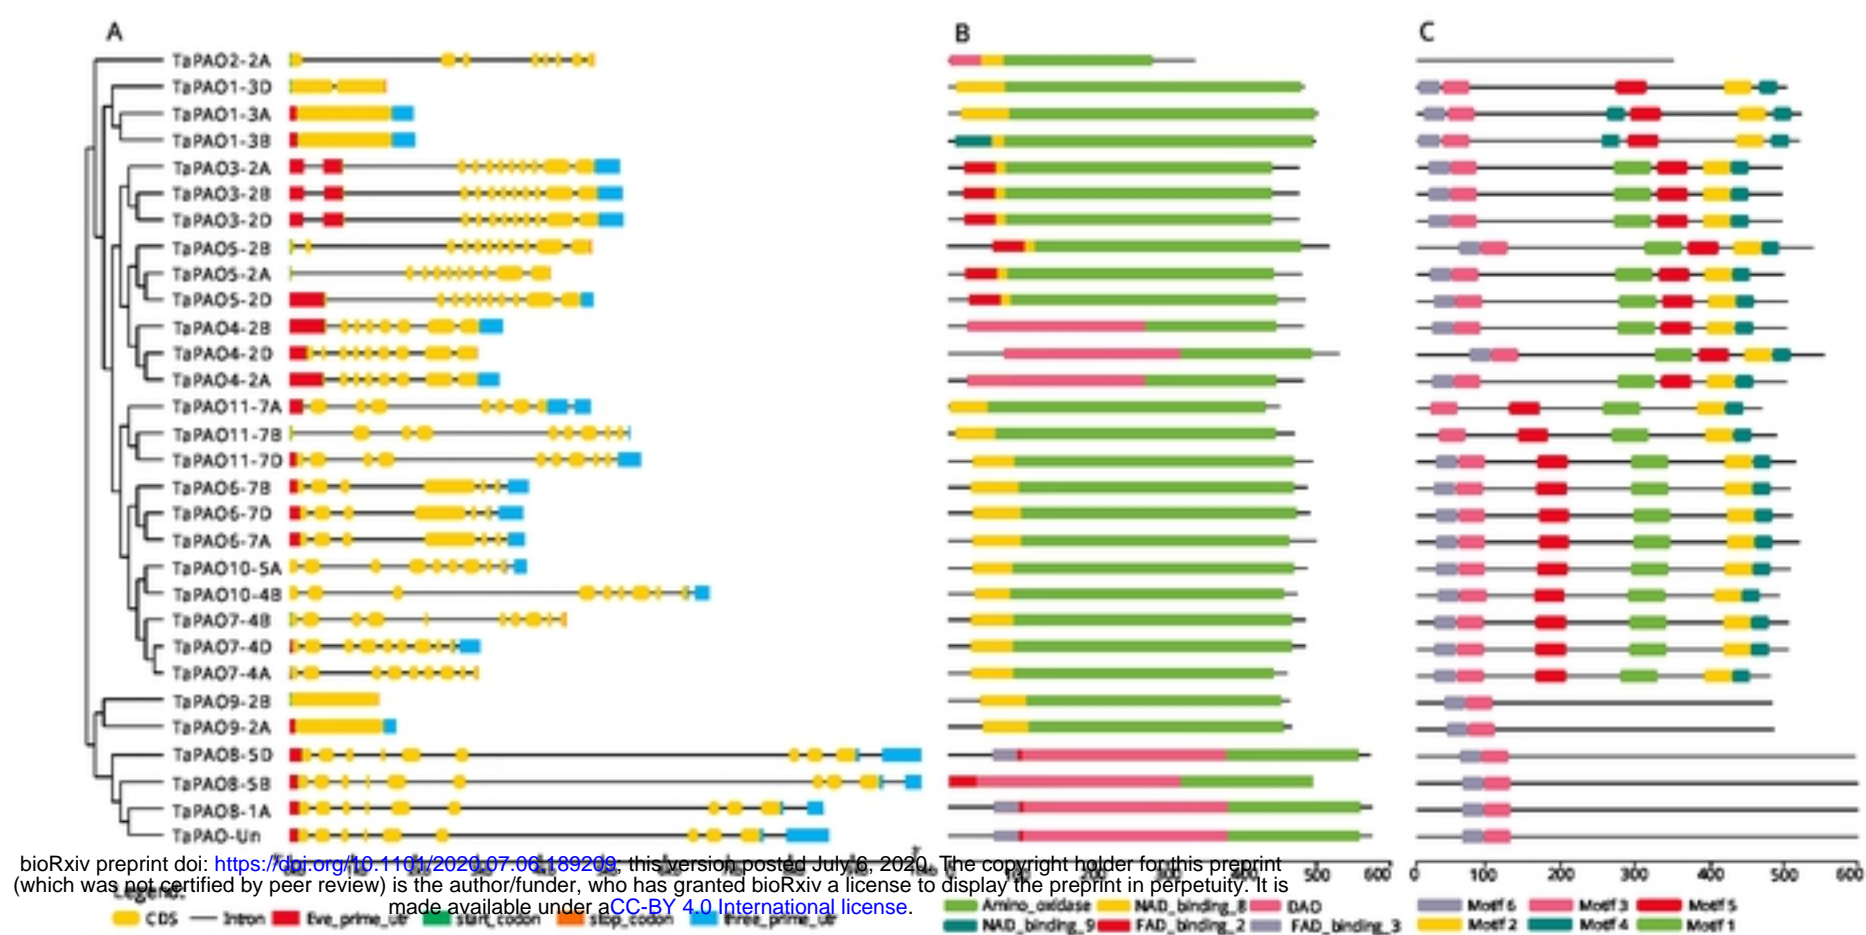

Figure 4

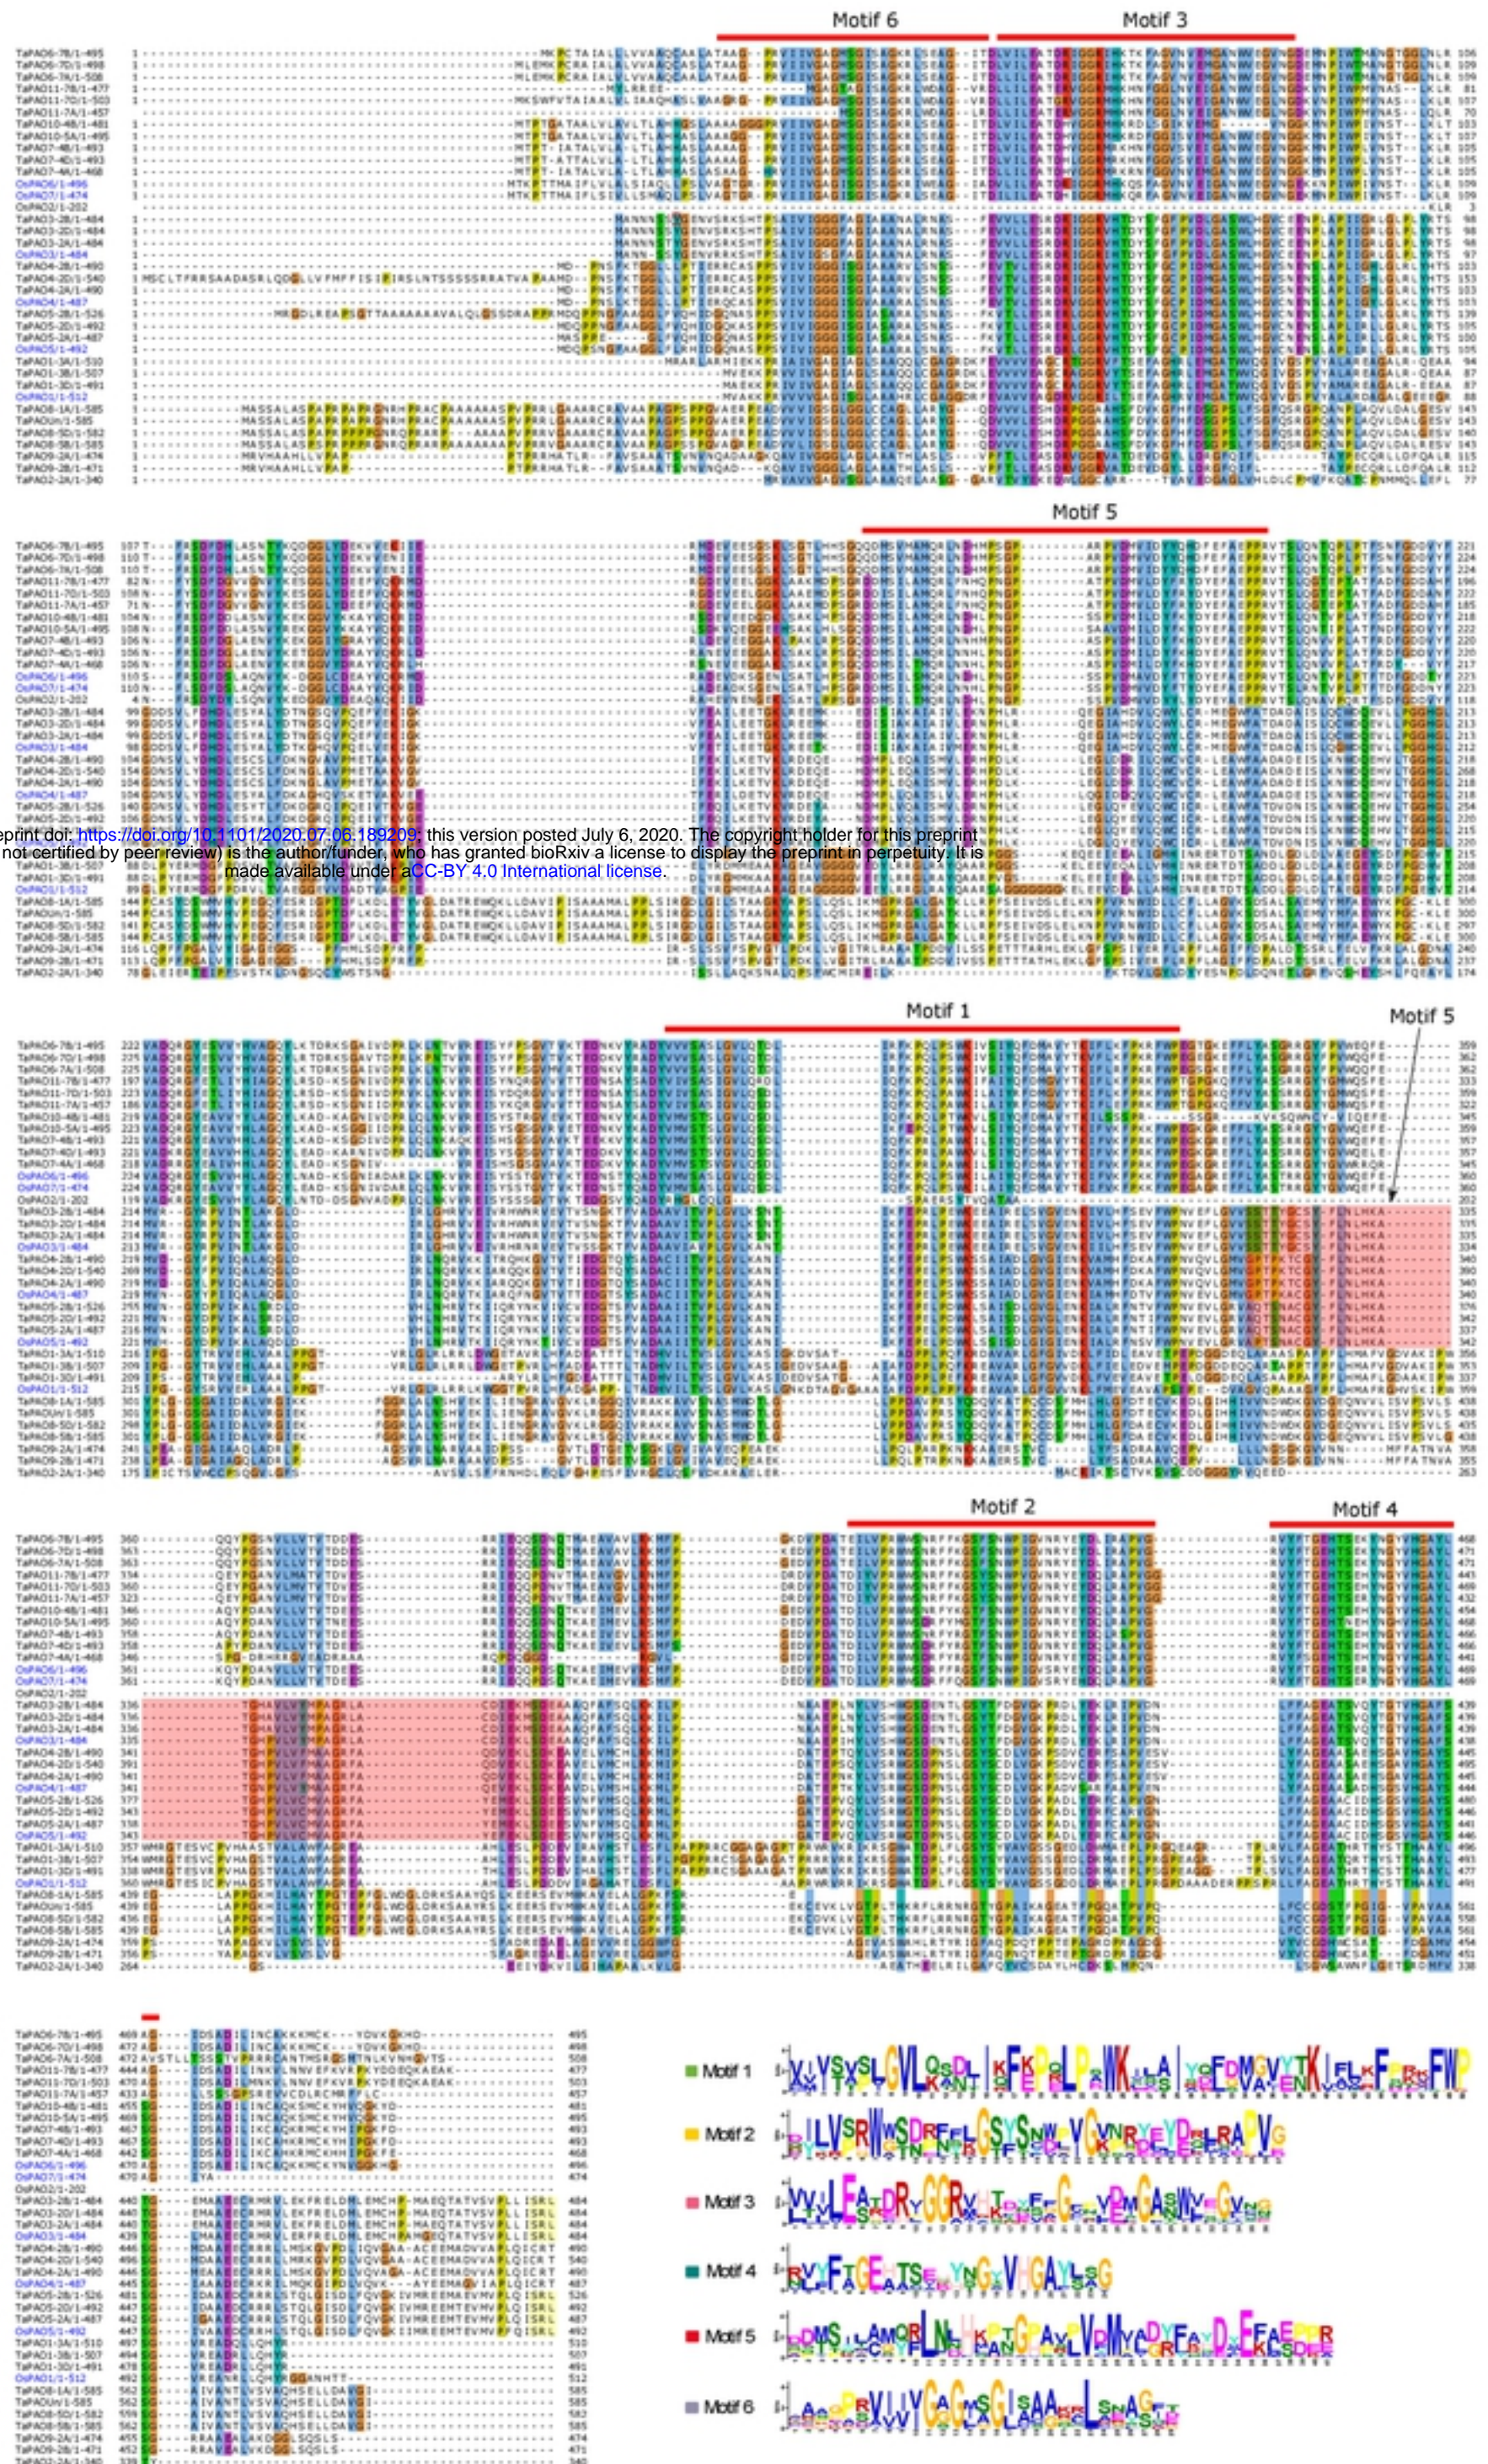

Figure 5

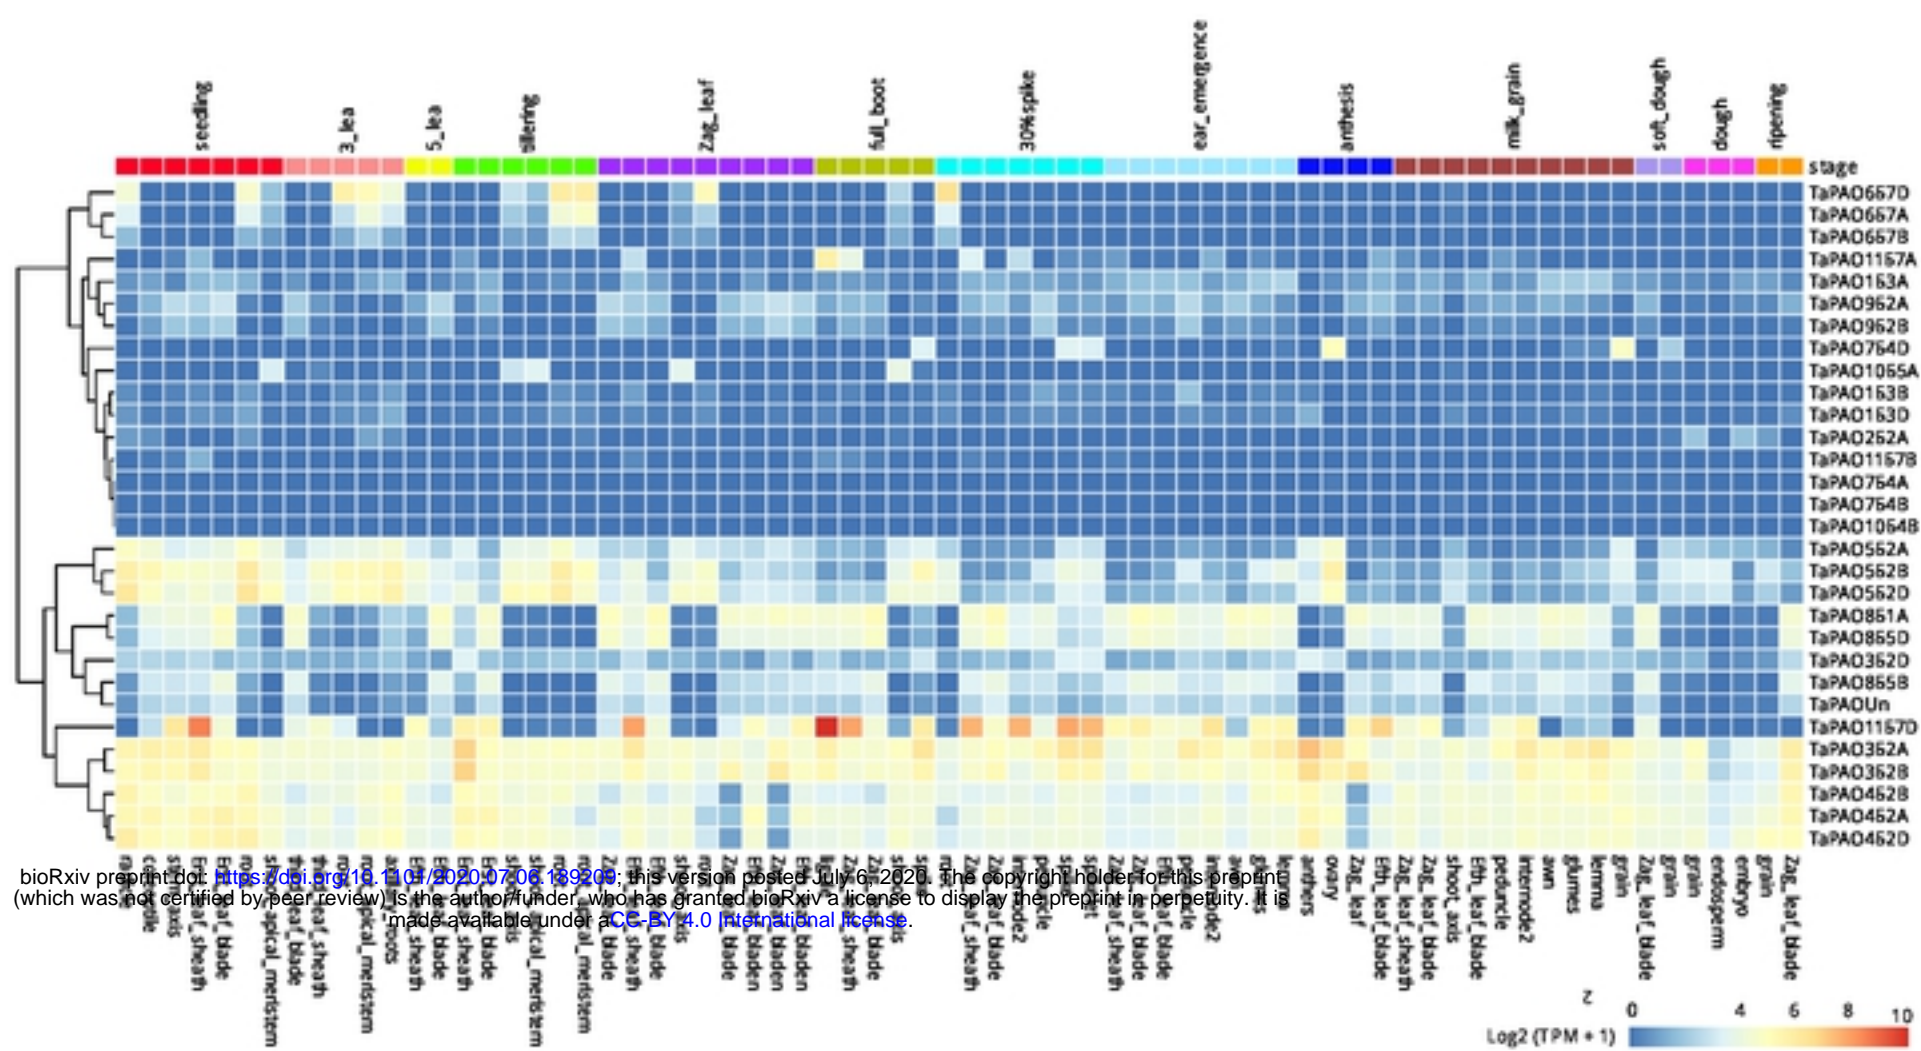

Figure 6

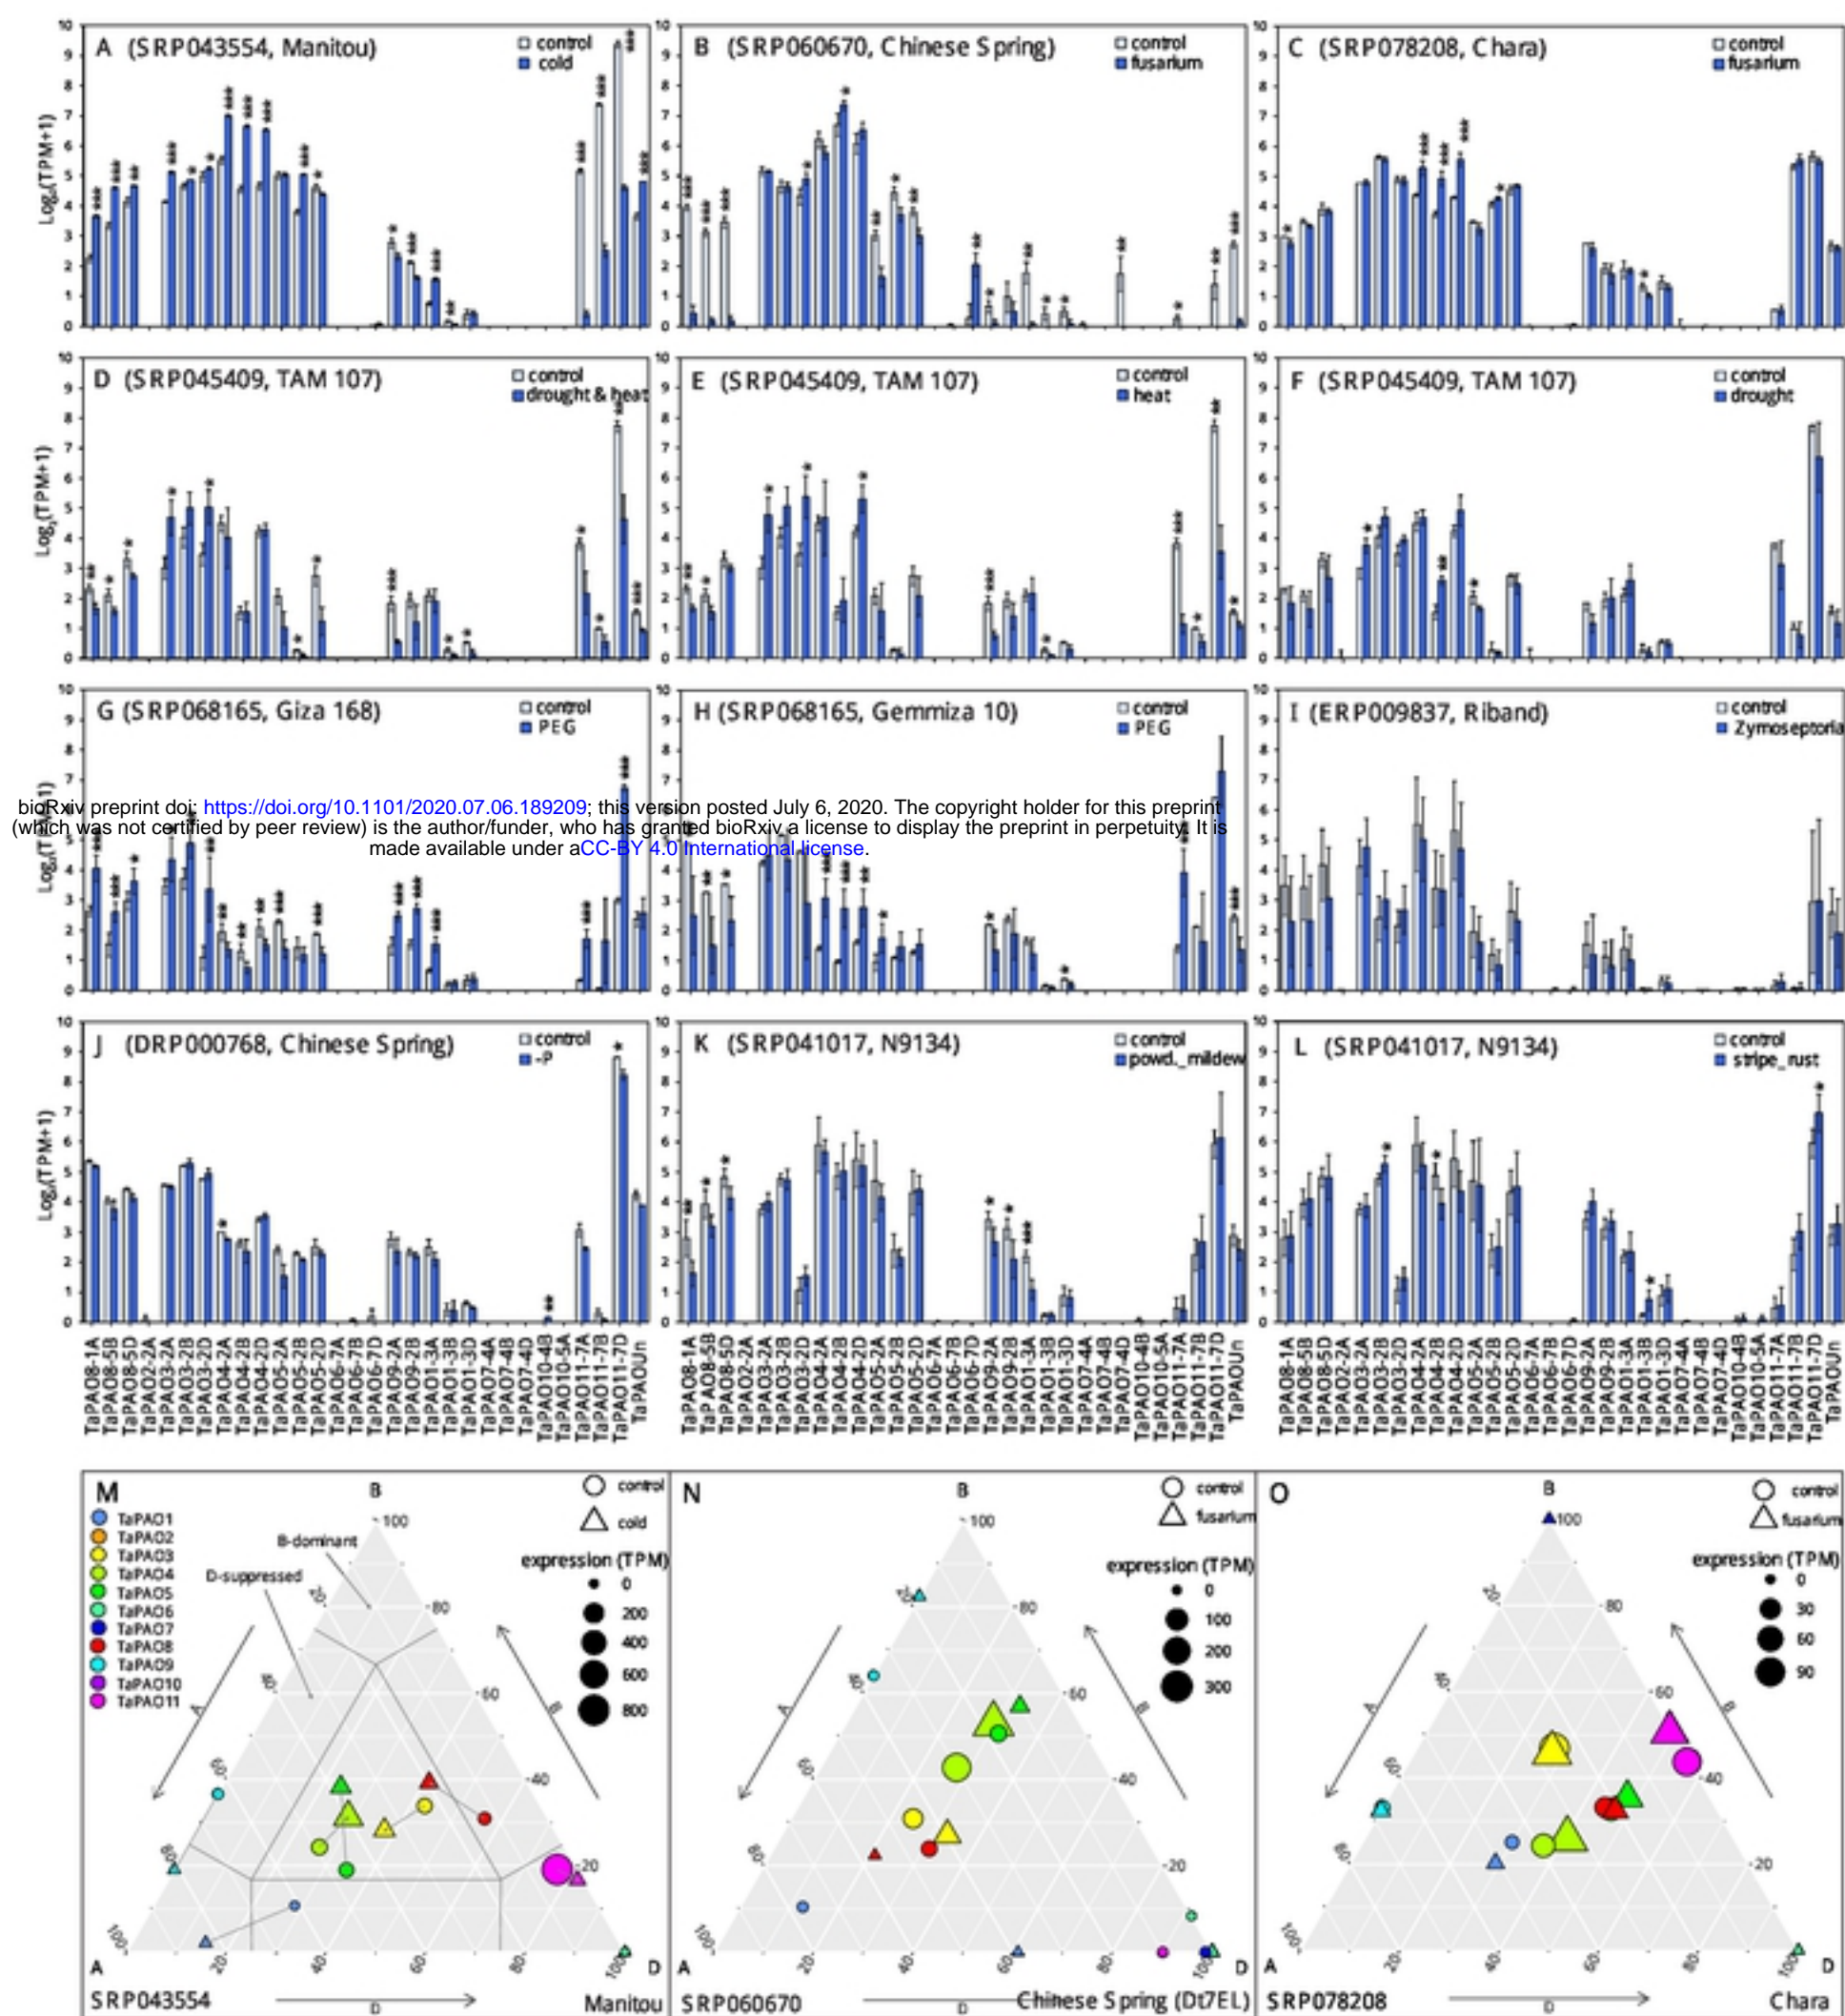

Figure 7

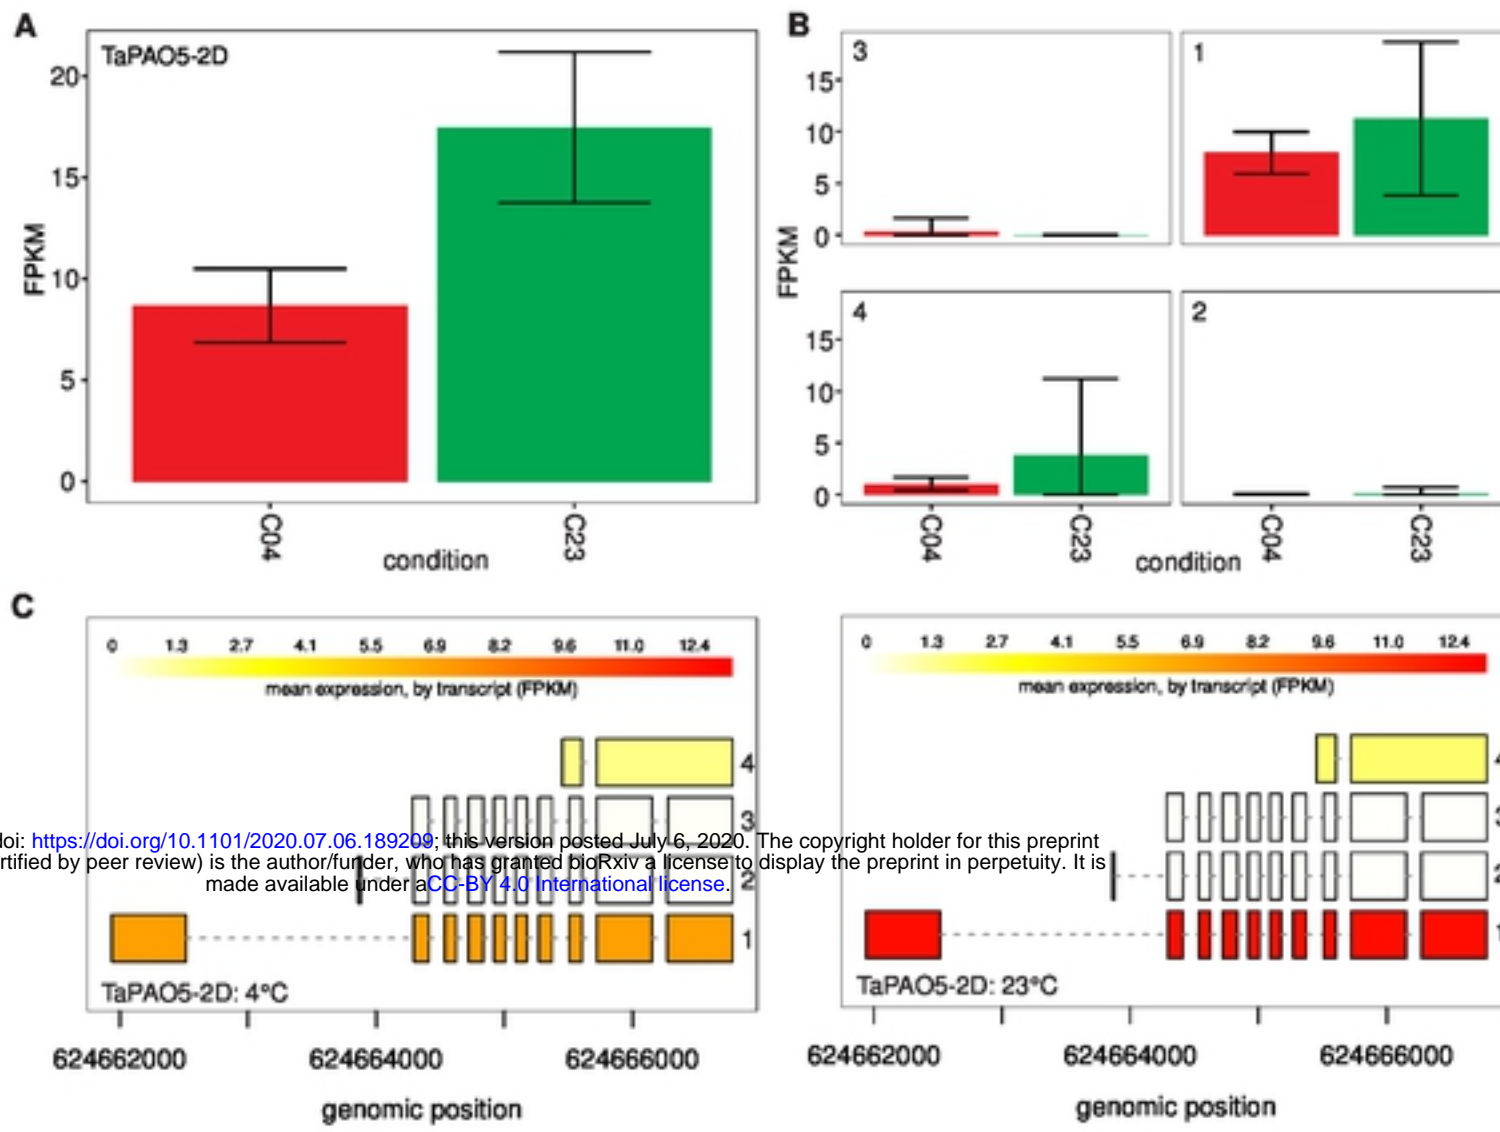

Figure 8

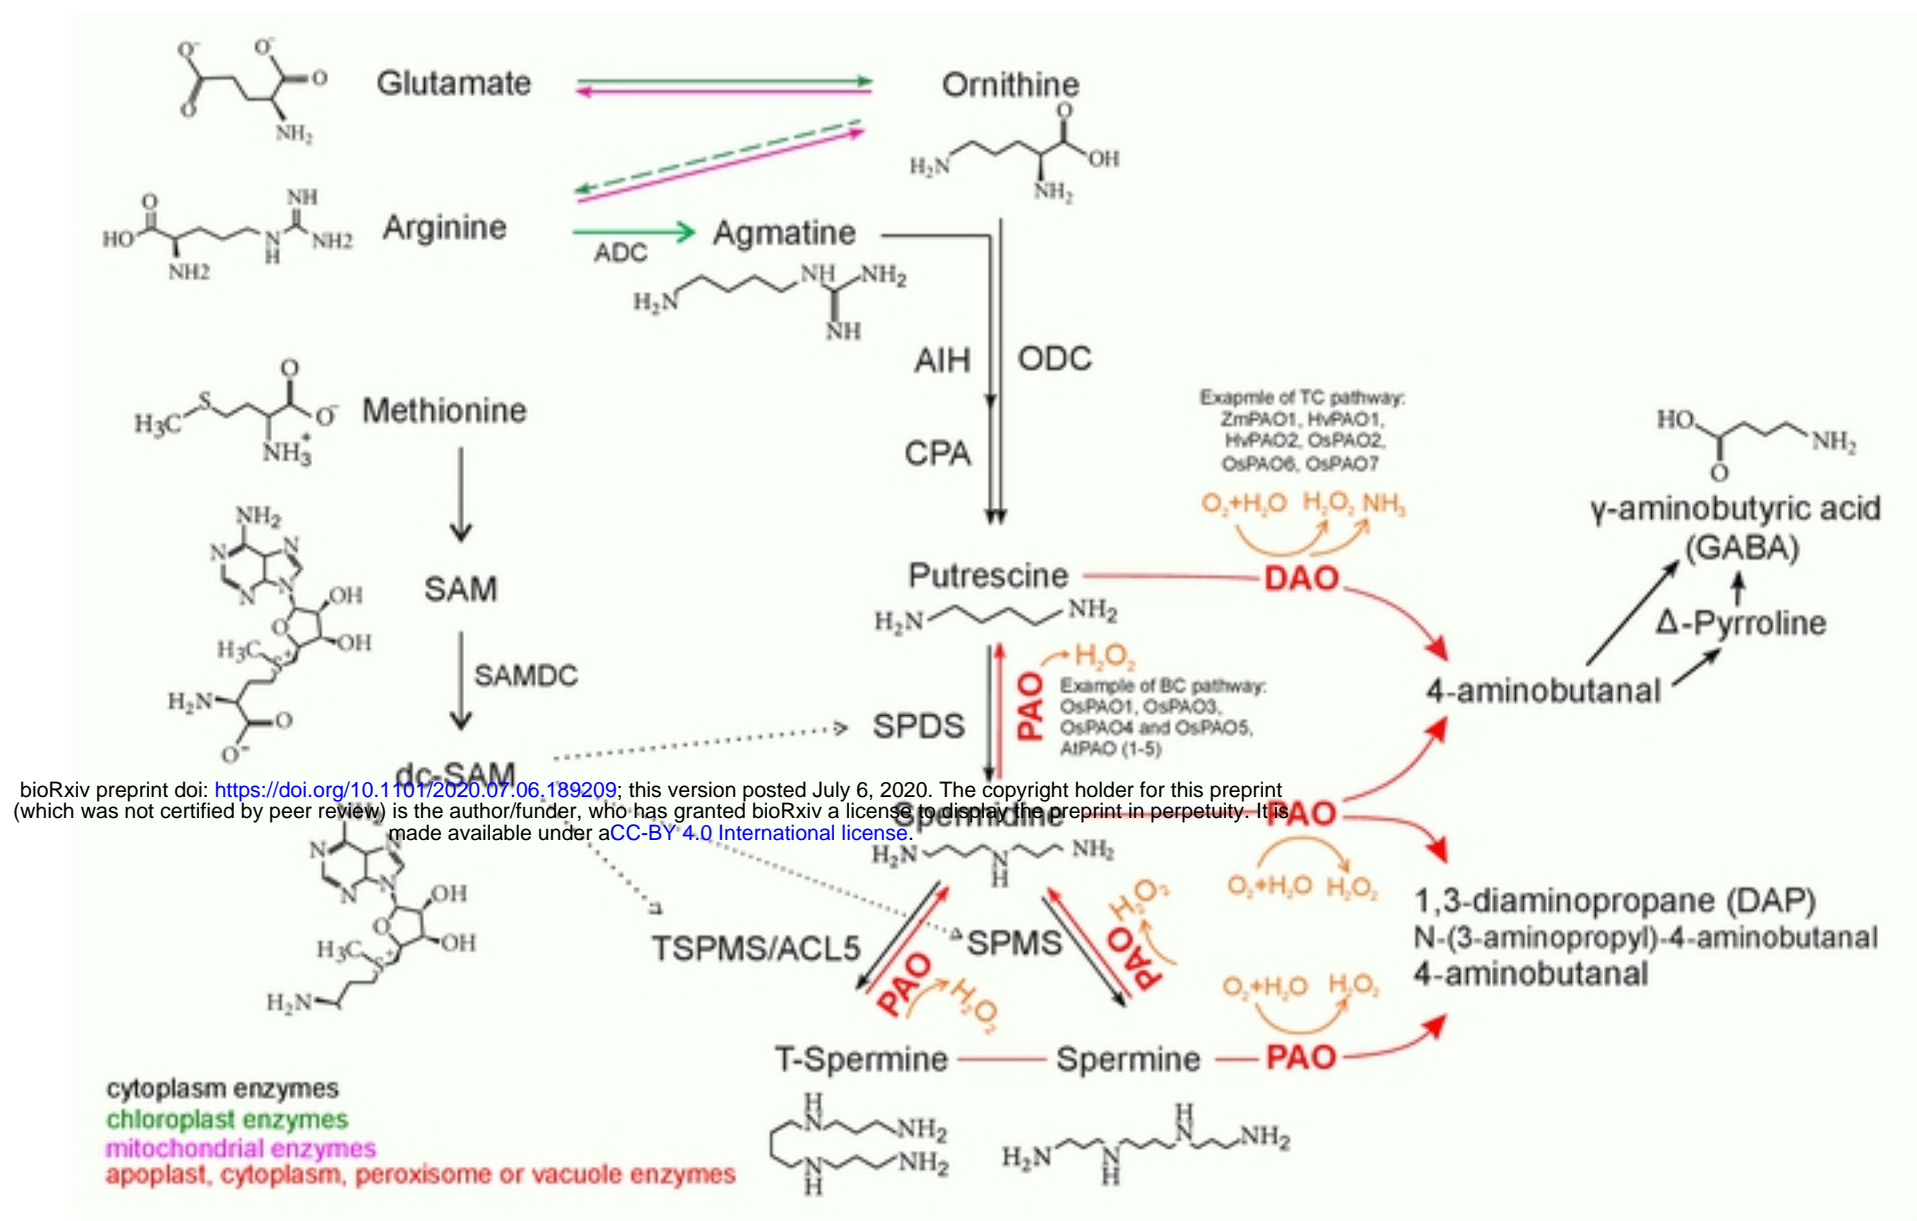

Figure 1

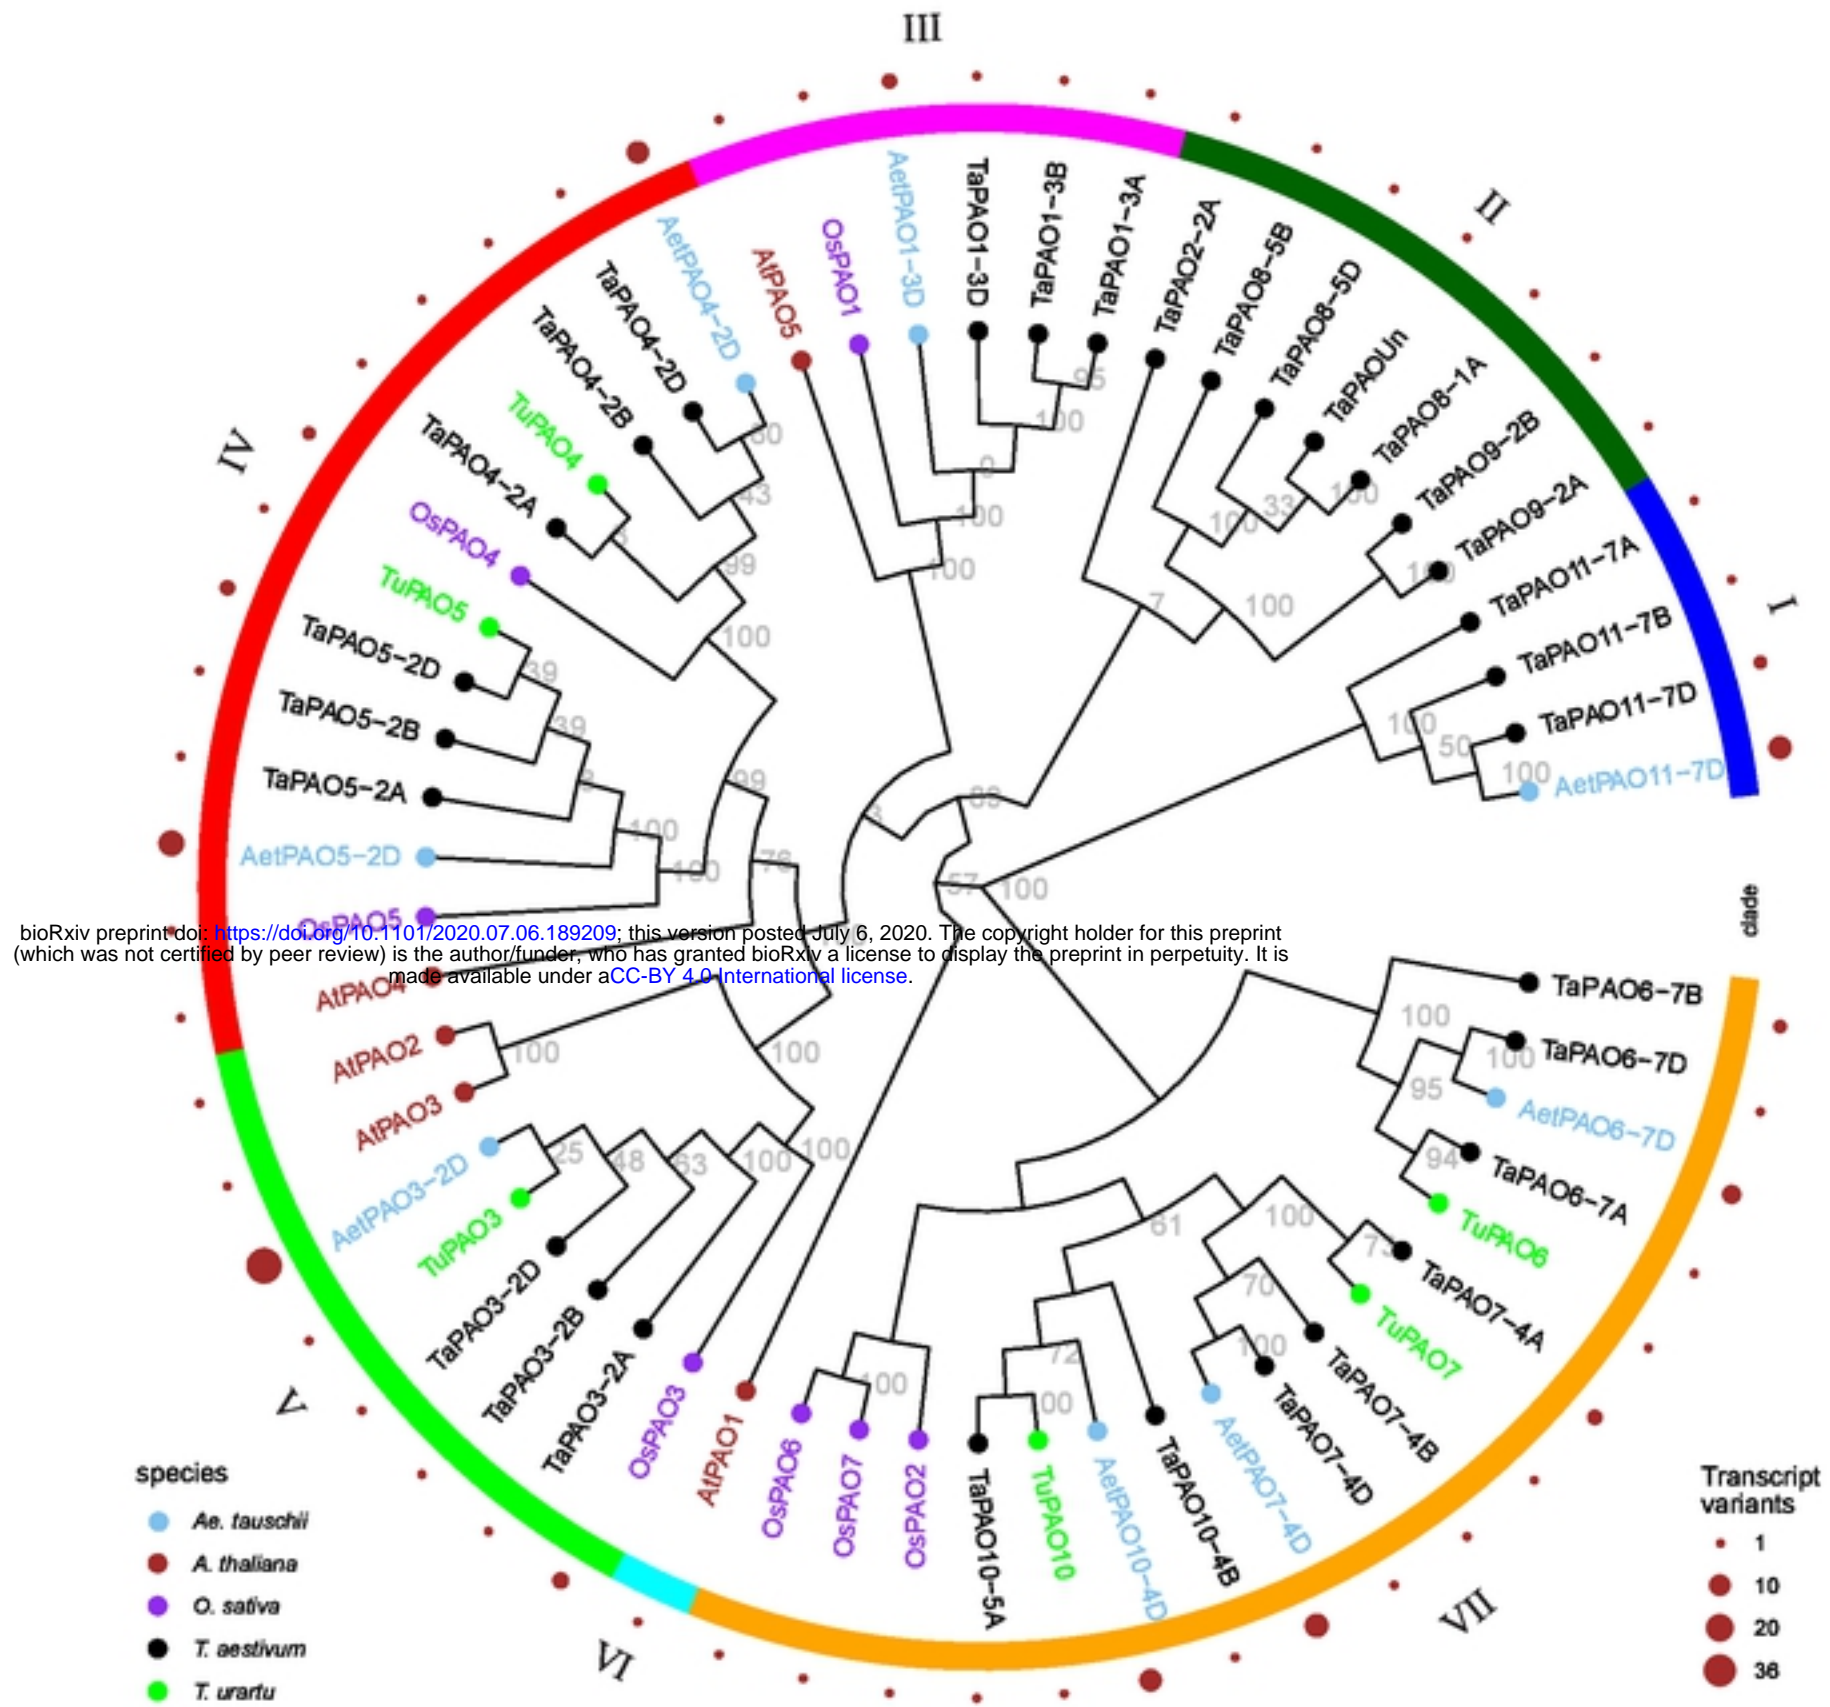

Figure 2
